# Supplementary material for: Development and validation of a clinical rule for recognition of early inflammatory arthritis
Source: PubMed Central journal article supplement — BMJ Open. 2018 Dec 2;8(11):bmjopen-2018-023552. doi: 10.1136/bmjopen-2018-023552 (PMC6278800; doi:10.1136/bmjopen-2018-023552), 2018-12-02
Supplement: bmjopen-2018-023552.draft_revisions.pdf [file bmjopen-2018-023552.draft_revisions.pdf]

# BMJ Open

BMJ Open is committed to open peer review. As part of this commitment we make the peer review history of every article we publish publicly available.

When an article is published we post the peer reviewers' comments and the authors' responses online. We also post the versions of the paper that were used during peer review. These are the versions that the peer review comments apply to.

The versions of the paper that follow are the versions that were submitted during the peer review process. They are not the versions of record or the final published versions. They should not be cited or distributed as the published version of this manuscript.

BMJ Open is an open access journal and the full, final, typeset and author-corrected version of record of the manuscript is available on our site with no access controls, subscription charges or pay-per-view fees (<http://bmjopen.bmj.com>).

If you have any questions on BMJ Open's open peer review process please email [editorial.bmjopen@bmj.com](mailto:editorial.bmjopen@bmj.com)

# BMJ Open

## Development and validation of a clinical rule for recognition of early inflammatory arthritis

|                               |                                                                                                                                                                                                                                                                                                                                                                                                                                                                                                                                                                                                                                                             |
|-------------------------------|-------------------------------------------------------------------------------------------------------------------------------------------------------------------------------------------------------------------------------------------------------------------------------------------------------------------------------------------------------------------------------------------------------------------------------------------------------------------------------------------------------------------------------------------------------------------------------------------------------------------------------------------------------------|
| Journal:                      | <i>BMJ Open</i>                                                                                                                                                                                                                                                                                                                                                                                                                                                                                                                                                                                                                                             |
| Manuscript ID                 | bmjopen-2018-023552                                                                                                                                                                                                                                                                                                                                                                                                                                                                                                                                                                                                                                         |
| Article Type:                 | Research                                                                                                                                                                                                                                                                                                                                                                                                                                                                                                                                                                                                                                                    |
| Date Submitted by the Author: | 11-Apr-2018                                                                                                                                                                                                                                                                                                                                                                                                                                                                                                                                                                                                                                                 |
| Complete List of Authors:     | ten Brinck, Robin; Leiden University Medical Centre, Rheumatology van Dijk, Bastiaan; Leiden University Medical Centre, Rheumatology van Steenberghe, Hanna; Leiden University Medical Centre, Rheumatology le Cessie, S; Leids Universitair Medisch Centrum, Numans, Mattijs; Leiden University Medical Centre, Department of Public Health and Primary Care Hider, Samantha; Keele University, Arthritis Research UK Primary Care Centre; Haywood Academic Rheumatology Centre, Rheumatology Mallen, Christian; Keele University, Arthritis Research UK Primary Care Centre van der Helm-van Mil, Annette; Leiden University Medical Center, Rheumatology |
| Keywords:                     | inflammatory arthritis, general practitioners, early recognition, clinical decision rule, rheumatoid arthritis                                                                                                                                                                                                                                                                                                                                                                                                                                                                                                                                              |
|                               |                                                                                                                                                                                                                                                                                                                                                                                                                                                                                                                                                                                                                                                             |

SCHOLARONE™  
Manuscripts

Only

1  
2  
3 *Research Article*

4  
5 **Development and validation of a clinical rule for recognition of early**  
6  
7  
8 **inflammatory arthritis**  
9

10  
11  
12 Short title: A clinical rule that supports identification of patients suspected of having IA  
13

14  
15  
16 Robin M. ten Brinck\* *MD*<sup>1</sup>, Bastiaan T. van Dijk\* *BSc*<sup>1</sup>, Hanna W. van Steenberghe *MD*<sup>1</sup>,

17  
18 Saskia le Cessie *PhD*<sup>2</sup>, Mattijs E. Numans *MD, PhD*<sup>3</sup>, Samantha L. Hider *MD, PhD*<sup>4,5</sup>

19  
20 Christian D. Mallen *MD, PhD*<sup>4</sup>, Annette H.M. van der Helm-van Mil *MD, PhD*<sup>1</sup>

21  
22 \* both contributed equally  
23

- 24  
25  
26  
27 1. Department of Rheumatology, Leiden University Medical Centre, Leiden, The  
28 Netherlands.  
29  
30 2. Department of Epidemiology and Statistics, Leiden University Medical Centre,  
31 Leiden, The Netherlands.  
32  
33 3. Department of Public Health and Primary Care, Leiden University Medical Centre,  
34 Leiden, Netherlands.  
35  
36 4. Research Institute for Primary Care and Health Sciences, Keele University,  
37 Newcastle, United Kingdom.  
38  
39 5. Haywood Academic Rheumatology Centre, Haywood Hospital, Stoke-on-Trent,  
40 Staffordshire, United Kingdom.  
41  
42  
43

44 **Address of correspondence:**

45 R.M. ten Brinck, MD,

46 Department of Rheumatology C1-R, Leiden University Medical Centre,

47 PO Box 9600, Leiden 2300RC, the Netherlands.

48 Telephone: 0031 71 5265655,

49 E-mail: [r.m.ten\\_brinck@lumc.nl](mailto:r.m.ten_brinck@lumc.nl)  
50  
51  
52  
53  
54  
55  
56  
57  
58  
59  
60

## ABSTRACT

*Objectives:* National and international guidelines recommend prompt referral of patients presenting with inflammatory arthritis (IA), but general practitioners (GPs) feel uncertain in their proficiency to detect synovitis through joint examination, the method of choice to identify IA. Our objective was to develop and validate a rule composed of clinical characteristics to assist GPs and other physicians in identifying IA.

*Design:* Split-sample derivation and validation study.

*Setting:* The Leiden Early Arthritis Recognition Clinic (EARC); a screening clinic for patients in whom GPs suspected the presence of IA.

*Participants:* 1,288 consecutive patients visiting the EARC .

*Primary and secondary outcome measures:* Associations of clinical characteristics with the presence of IA were determined using logistic regression in 644 patients, while validating the results in the other 644 patients (split-sample validation). To facilitate application in clinical practice, a simplified rule (with scores ranging from 0 to 7.5) was derived and validated.

*Results:* IA was identified by a rheumatologist in 41% of patients. In univariable analysis, male gender, age  $\geq 60$  years, symptom duration of  $< 6$  weeks, morning stiffness  $> 60$  minutes, a low number of painful joints (1-3 joints), presence of patient-reported joint swelling, and difficulty with making a fist were associated with IA in the derivation dataset. Using multivariable analysis, a simplified rule consisting of these seven items was derived and validated which yielded an Area Under the Receiver Operator Characteristic curve (AUC) of 0.74 (95%CI 0.70–0.78) in the derivation dataset. Validation yielded an AUC of 0.71 (95%CI 0.67–0.75). Finally, the model was repeated to study predicted probabilities with a lower prevalence of inflammatory arthritis to simulate performance in primary care settings.

1  
2  
3 *Conclusions:* Our rule, composed of clinical parameters, had reasonable discriminative ability  
4  
5 for IA and could assist physicians in decision-making in patients with suspected IA  
6  
7 increasing the appropriateness of health care utilization.  
8  
9  
10  
11  
12

13 **KEYWORDS:**

14  
15 Inflammatory Arthritis, General Practitioners, Early Recognition, Clinical Decision Rule,  
16  
17 Rheumatoid Arthritis  
18  
19  
20  
21  
22  
23  
24  
25  
26  
27  
28  
29  
30  
31  
32  
33  
34  
35  
36  
37  
38  
39  
40  
41  
42  
43  
44  
45  
46  
47  
48  
49  
50  
51  
52  
53  
54  
55  
56  
57  
58  
59  
60

### Strengths and limitations of this study

- A clinical rule could help to select patients to refer for additional investigations (laboratory or imaging) or to secondary care. This could promote early identification of inflammatory arthritis and increase appropriateness of health care utilization.
- Data were collected prospectively in a population of patients in which general practitioners had doubt on the presence of inflammatory arthritis.
- The main limitation is that data were not collected in primary care itself, but in a setting intermediary between primary and secondary care. Further external validation in GP settings is therefore required.

## BACKGROUND

Early initiation of disease modifying anti-rheumatic drugs is strongly associated with improved outcomes of rheumatoid arthritis (RA).[1] National and international guidelines attempt to facilitate this by emphasizing prompt referral of patients presenting with inflammatory arthritis (IA) to a rheumatologist. The European League Against Rheumatism (EULAR) taskforce for the management of early IA recommends referral within 6 weeks of onset of symptoms[2], while in the United Kingdom (UK) the National Institute for Health and Care Excellence (NICE) guidelines advises referral to a rheumatologist in patients with new, persistent (>3–4 weeks) synovitis within three working days.[3] However, it was demonstrated that this referral timeline is achieved in only 17% of patients.[4] On average, RA patients are seen four (and sometimes more than eight) times by general practitioners (GPs) before they refer to secondary care[5-8], which may reflect the difficulty of differentiating patients with early IA from patients with other types of common musculoskeletal symptoms. A recent qualitative study revealed that GPs acknowledge the importance of early detection and referral, but feel uncertain in their proficiency to detect synovitis through joint examination, the method of choice to identify IA.[2,9] As a consequence, the referral to a rheumatologist may be delayed, which contributes to overall treatment delay in early RA, as observed in Europe.[10,11]

This is further complicated by the high incidence of consultations for various common musculoskeletal symptoms and the low incidence of early IA in primary care.[12] The consultation prevalence of any musculoskeletal symptom in primary care in the UK approximates 2405 per 10,000 per year [13], making it the most common organ system consulted for at GP practices.[12-14] Although musculoskeletal symptoms are common, GPs

1  
2  
3 suspect IA (based on pattern recognition) in only a very small minority of patients.[5] In  
4 these patients, GPs often lack confidence in joint assessment for synovitis.  
5  
6  
7

8  
9 To support early detection, several initiatives have been developed, including triage systems.  
10  
11 The best studied triage system (the Early Inflammatory Arthritis Questionnaire) was  
12  
13 developed and validated for patients attending secondary and tertiary care.[15-17]  
14  
15 Furthermore, several referral guidelines for GPs[6,18-22], and public awareness campaigns  
16  
17 have been developed, for instance one attempting to simplify pattern recognition to the “S-  
18  
19 Factor”: Stiffness, Swelling, Squeezing. However, none of these initiatives were designed  
20  
21 using primary care data, and all assume that GPs can differentiate between the presence and  
22  
23 absence of joint swelling[6,18-20], which continues to be a barrier to the early detection of  
24  
25  
26 IA.  
27  
28  
29  
30

31 Altogether there is a contradiction with the need to refer as quickly as possible while  
32  
33 evidence who must be referred or, in line with this, in whom additional investigations are  
34  
35 appropriate is lacking. To solve the issue, we have developed and validated a rule composed  
36  
37 of clinical characteristics, by taking advantage of data from a setting intermediate between  
38  
39 primary and secondary care. This intermediate setting of an the Early Arthritis *Recognition*  
40  
41 Clinic was a local solution to promote early referrals and is not easy implementable in other  
42  
43 regions. The clinical rule derived from these data however, is easy to apply and may assist in  
44  
45 the decision-making process in patients with musculoskeletal symptoms with suspected IA at  
46  
47 other places, in order to promote early identification of IA.  
48  
49  
50  
51

## 52 **METHODS**

53  
54  
55  
56  
57  
58  
59  
60



### Study population

To promote early recognition of early IA, the Early Arthritis *Recognition* Clinic (EARC) was initiated in September 2010 in Leiden, the Netherlands. The outpatient clinic of the department of Rheumatology of the Leiden University Medical Center (LUMC) is the only referral center in a healthcare region of ~400,000 people. GPs were instructed to refer patients to the EARC in whom they were unsure about the presence of IA (instead of a ‘wait-and-see’ approach or performing additional tests). The EARC system has reduced referral delay from 8 to 2 weeks, and improved early identification of IA.[11,23] To emphasize the importance of early identification of IA and aiming to inform on the purpose of the EARC, a region-wide educational campaign was conducted among regional GPs.

In addition to (and distinct from) the EARC, the LUMC also has an Early Arthritis Clinic (EAC). The EAC was established in 1993 to include and follow patients with early arthritis and to offer the possibility of rapid access to rheumatology care, usually within a week of referral. To differentiate between the clinics, GPs were instructed to refer to the EAC if there was a clear synovitis or very high suspicion of IA (i.e. to continue as they had before, since there was no benefit for such patients to go the EARC first) and to refer to the EARC when in doubt about the presence of IA (i.e. to not ‘wait-and-see’ or order additional tests).

The EARC screening clinic was held twice a week between 2010–2014 and once a week from 2014 onwards. After GP referral, patients can visit the EARC without an appointment. All patients that visited the EARC between 2010 and September 2015 were studied.

### Data collection

1  
2  
3 At the EARC, patients completed a short questionnaire about their joint symptoms, after  
4  
5 which they were seen by an experienced rheumatologist (AvdHvM or other senior  
6  
7 rheumatologists) who performed a full 66-joint examination. If synovitis was determined by  
8  
9 physical examination, patients were fast-tracked to visit the EAC within 1 week for further  
10  
11 evaluation and treatment. Patients without IA were discharged to primary care. The  
12  
13 questionnaire completed by patients, provided in S1 Appendix, contained questions on age,  
14  
15 gender, date of symptom onset, date of first visit to GP, presence of a (sub)acute symptom  
16  
17 onset (versus a gradual symptom-onset), morning stiffness (duration in minutes), which part  
18  
19 of the day symptoms were worst, and whether they had difficulty with making a fist. Patients  
20  
21 were asked to indicate on a 52-joint mannequin which joints were painful and which joints  
22  
23 they considered to be swollen. IA, defined as synovitis confirmed by the rheumatologist at  
24  
25 physical examination, was used as outcome.  
26  
27  
28  
29  
30

31 Collected data was anonymized and entered in a research database at chronological order of  
32  
33 visiting the EARC. The local medical ethical committee approved this study.  
34  
35  
36  
37

### 38 **Derivation and validation of the model**

39 We used half of the dataset for derivation and the other half for validation of results (split-  
40  
41 sample validation). To prevent bias by (unknown) effects of inclusion period, patients with  
42  
43 odd ID-numbers (1,3,etc) were included in the derivation dataset and those with even ID-  
44  
45 numbers (2,4,etc) were used for validation.  
46  
47  
48  
49

50 To prevent exclusion of patients with one or more missing variables, we imputed missing  
51  
52 values using chained equations[24]; frequencies of missing variables are presented in S2  
53  
54 Appendix. The variables ‘difficulty with making a fist’ and ‘self-reported joint swelling’  
55  
56  
57  
58  
59  
60

1  
2  
3 were most frequently missing as these were added to the questionnaire after April 1<sup>st</sup> 2012,  
4  
5 thus absence of these data was considered to occur completely at random.  
6  
7

8  
9 We conducted logistic regression analysis modelling with presence of IA (defined as  
10  
11 rheumatologist-confirmed synovitis on physical examination) as dependent variable.  
12  
13 Continuous variables were categorized using clinically relevant cut-offs: age: <40 / 40–59.9 /  
14  
15 ≥60 years; duration of symptoms: <6 / 6–11 / 12–51.9 / ≥52 weeks; duration of morning  
16  
17 stiffness: ≤60 / >60 minutes; number of painful joints: 0 / 1–3 / 4–10 / ≥11; number of  
18  
19 swollen joints: 0 / 1–3 / 4–10 / ≥11. We performed univariable logistic regression to evaluate  
20  
21 associations between dependent variables and presence of IA. Variables with p-values <0.05  
22  
23 in univariable analyses were entered in multivariable regression analyses (enter model) to  
24  
25 obtain a model with a small number of variables. If several categories within a variable had  
26  
27 similar regression coefficients in multivariable modelling, we pooled these categories and  
28  
29 repeated the analysis. In sub-analysis, we also performed a multivariable logistic regression  
30  
31 model with the pooled categories using backward selection.  
32  
33  
34  
35  
36

37 To obtain a simplified rule applicable in daily care, we rounded the regression coefficients of  
38  
39 the final multivariable logistic regression model to the nearest 0.5 (irrespective of p-value).  
40  
41 This resulted in an easily calculable risk score. For each value of the risk score, we  
42  
43 determined test characteristics (i.e. sensitivity and specificity) and predicted probabilities of  
44  
45 the presence of inflammatory arthritis.  
46  
47  
48  
49

50 We evaluated the overall discriminative ability of the models using the Area Under the  
51  
52 Receiver Operating Characteristic curve (AUC). The model's calibration was assessed by  
53  
54 generating a calibration plot to measure goodness of fit, where the data was partitioned in 10  
55  
56  
57  
58  
59  
60

1  
2  
3 equally sized groups based on the predicted probabilities using the final fitted multivariable  
4  
5 model. In each group, the average predicted probability on current IA was compared with the  
6  
7 observed prevalence, both in the derivation and validation dataset. Additionally, the Hosmer-  
8  
9 Lemeshow statistic was calculated.  
10

11  
12  
13 Patients included in this study represent the difficult group in whom GPs were uncertain of  
14  
15 the presence of suspected IA; patients with a very high degree of suspicion were referred  
16  
17 directly to the EAC, whereas patients with a very low degree of suspicion for inflammatory  
18  
19 arthritis may not have been sent to the EARC. This means that pre-test and post-test  
20  
21 probabilities of IA are likely to be different when the simplified rule is used in primary care  
22  
23 itself. Accurate data on this probability in GP practices is lacking, but a study among sixteen  
24  
25 GP practices revealed that 27% of 188 patients assigned with the International Classification  
26  
27 of Primary Care-1 code for suspected inflammatory arthritis in their medical record had  
28  
29 confirmed RA (n=38), polyarthritis (n=5), or oligoarthritis (n=8) following rheumatologist's  
30  
31 assessment. Another study among GPs found that 18% of patients with suspected  
32  
33 inflammatory arthritis was referred; though data on rheumatologists' diagnoses was not  
34  
35 provided.[25] Guided by these very scarce data obtained in GP practices, post-test  
36  
37 probabilities on the presence of inflammatory arthritis were simulated with an estimated pre-  
38  
39 test probability of 20%.[5] We adjusted the intercept of the regression model as described in  
40  
41 [26,27] and plotted average estimated predicted probabilities against the regression and  
42  
43 simplified risk score.  
44  
45  
46  
47  
48  
49

50 Statistical analyses were performed using Statistical Package for the Social Sciences (SPSS,  
51  
52 version 23.0). P-values <0.05 were considered significant.  
53  
54  
55  
56  
57  
58

## Patient involvement

Patient research partners agreed with the pathway of care at the EARC. They also provided feedback on the questionnaire, which was expanded in 2012 with two questions.

## RESULTS

### Patients

1,288 patients in whom GPs were unsure about the presence of IA visited the EARC between 2010 and 2015; of these, 41% had synovitis at joint examination. The frequency of inflammatory arthritis was stable throughout the study years (S3 Appendix). Baseline characteristics of patients in both derivation and validation dataset are presented in Table 1.

### Model derivation

In univariable analyses, male gender, age  $\geq 60$  years, symptom duration of  $< 6$  weeks, an acute onset of symptoms, morning stiffness  $> 60$  minutes, a low number of painful joints (1–3 joints), presence of patient-reported joint swelling (1–3 joints), and difficulty with making a fist were associated with the presence of IA in the derivation dataset (Table 2). ‘Symptoms worst in the early morning’ was not associated with IA and therefore not included in multivariable analysis. Two multivariable models were created with categorized variables; first a model with categories similar to the univariable analysis (Table 3, model 1), and secondly a model pooling categories per variable with similar regression coefficients (Table 3, model 2). Performing this second model in the derivation dataset revealed that male gender, age  $\geq 60$  years, symptom duration of  $< 6$  weeks, a low number of painful joints (1–3 joints), and presence of patient-reported joint swelling were independently associated with the presence of IA (Table 3). The AUC of model 2 was 0.75 (95%CI 0.70–0.79) in the

1  
2  
3 derivation dataset. In sub-analysis, model 2 was repeated with a backward selection  
4  
5 procedure, showing similar regression coefficients (S4 Appendix).  
6  
7

### 9 **Generation of a simplified rule**

10  
11 In order to facilitate usage in routine clinical practice, a simplified model was generated (S5  
12  
13 Appendix). The obtained regression coefficient of acute onset of symptoms in multivariable  
14  
15 modelling was -0.015, yielding 0 points. Also after exclusion of this variable, the regression  
16  
17 coefficients of the other seven variables in the model did not change yielding similar points.  
18  
19 This resulted in a simplified rule consisting of seven scored items and a total score ranging  
20  
21 from 0 to 7.5 with corresponding predicted risks (Figure 1). Risks of IA predicted by the  
22  
23 model as a function of the regression score (i.e. the sum of the regression coefficients times  
24  
25 the value of the corresponding covariates) are presented in Figure 2A; as shown,  
26  
27 simplification did not majorly affect the predicted risks. The calibration plot shows that  
28  
29 predicted probabilities correlated well with the observed proportions of patients with IA (S6  
30  
31 Appendix). The Hosmer-Lemeshow test for the derivation dataset yielded a P-value of 0.36.  
32  
33 If cut-offs are required and a highly sensitive approach is preferred (>90% sensitivity), this is  
34  
35 obtained by a cut-off score of  $\geq 4$ . When a highly specific approach is preferred (>90%  
36  
37 specificity), this is obtained by a cut-off score of  $\geq 6$ . Test characteristics for all cut-off points  
38  
39 are presented in S7 Appendix. The AUC of the simplified score, measuring discrimination,  
40  
41 was 0.74 (95%CI 0.70–0.78; S8 Appendix).  
42  
43  
44  
45  
46  
47

### 48 **Validation**

49  
50 The final multivariable model (model 2) was applied in the validation dataset, revealing  
51  
52 similar results (Table 3). The AUC was 0.72 (95%CI 0.68–0.77). Figure 2A shows the  
53  
54 predicted probabilities of the simplified rule are almost similar to those obtained in the  
55  
56  
57  
58  
59  
60

1  
2  
3 derivation data. The AUC of the simplified rule was 0.71 (95%CI 0.67–0.75) in the validation  
4 dataset. The calibration plot is shown in S6 Appendix, the Hosmer-Lemeshow test for the  
5 validation dataset yielded a P-value of 0.43.  
6  
7  
8  
9

### 10 11 **Simulation of accuracy in a setting with a lower prevalence of IA**

12  
13 In contrast to test characteristics, predicted probabilities depend on the prior risk (i.e.  
14 prevalence) of IA. The frequency of IA among primary care patients with GP-determined  
15 clinical suspicion of IA may be different than that observed in the EARC. Based on  
16 observations in GP practices[5,25], a simulation was run for the regression and simplified  
17 score with a prevalence of inflammatory arthritis set at 20%. Estimated predicted  
18 probabilities for different scores of the multivariable model and simplified rule (in derivation  
19 and validation datasets) are presented in Figure 2B.  
20  
21  
22  
23  
24  
25  
26  
27  
28  
29  
30

31 Our simplified rule was implemented in a web application that provides predictions on the  
32 presence of current IA for individual patients; a screenshot is presented in Figure 3. The web  
33 application is accessible online at <http://caretool.eu/>  
34  
35  
36  
37  
38

### 39 **DISCUSSION**

40  
41  
42  
43 GPs play a crucial role in the early identification of RA and often lack confidence in  
44 detecting joint synovitis.[9] In an attempt to solve the contradiction between the need to refer  
45 very early and absence of evidence who must be referred, we provided an evidence-based and  
46 simple method to identify the presence of IA in patients in whom IA is suspected. This  
47 clinical rule helps to select patients to refer for additional investigations (laboratory or  
48  
49  
50  
51  
52  
53  
54  
55  
56  
57  
58  
59  
60

1  
2  
3 imaging) or to secondary care. Hence, the Clinical Arthritis Rule could increase  
4  
5 appropriateness of health care utilization.  
6  
7

8  
9 This study is different from studies that derived tools to facilitate triage of patients that have  
10  
11 been referred to secondary or tertiary care[15-17] as our study did not aim to prioritize  
12  
13 patients that are already referred. In addition, we aimed to facilitate recognition of IA (as this  
14  
15 would necessitate referral to a rheumatologist) and did not perform a longitudinal study to  
16  
17 predict development of specific diagnoses (e.g. RA) later-on. This explains why several  
18  
19 factors were found to be associated with presence of IA that are not generally considered  
20  
21 typical for RA (male gender, a low number of painful joints, a short symptom duration). GPs  
22  
23 generally do well in identifying those at high risk for development of RA (i.e. women at  
24  
25 younger ages with subacute smouldering polyarticular, symmetric complaints), and therefore  
26  
27 we aimed this tool to assist GPs in decision-making for more atypical or non-classical  
28  
29 presentations of IA (e.g. due to overlap of symptoms with other diagnoses) leading to doubt.  
30  
31 Indeed, many of the patients that did not have synovitis at the EARC had symptoms due to  
32  
33 diagnoses that are characterized by longstanding or extensive joint pain (e.g. osteoarthritis,  
34  
35 fibromyalgia), explaining higher scores for a short symptom duration or a low number of  
36  
37 symptomatic joints.  
38  
39  
40  
41  
42  
43

44 Adding other clinical variables might increase the discriminative ability of the model.

45  
46 Potential examples include the squeeze test of the metacarpophalangeal joints (although the  
47  
48 diagnostic accuracy was shown to be only moderate[28]), information on family history, or  
49  
50 functional impairments. These items were not routinely collected before December 2015.

51  
52 Adding data on laboratory investigations to our rule could potentially also increase its  
53  
54  
55  
56  
57  
58  
59  
60



1  
2  
3 discriminative ability. However, our data do not permit us to evaluate this, as additional  
4 investigations were done afterwards and only in patients with synovitis at joint examination.  
5  
6  
7

8  
9 A strength of our EARC for the purpose of this study is that GPs in our region are familiar  
10 with early referral, that regional healthcare logistics make rheumatology care rapidly  
11 available for patients with arthritis, with the EARC as ultimate service for patients in whom  
12 GPs suspect (but are unsure about) IA. With the availability of the EARC every week and  
13 lack of any waiting list for the EARC, we assume a low number of patients not showing up at  
14 the EARC despite being encouraged by their GP to visit the EARC. As the EARC serves as a  
15 unique bridge between primary and secondary care, its patients closely resemble the  
16 population GPs have contact with and have doubts about. Although the EARC is  
17 successful[11,23], this approach may be more difficult to implement in other centres or  
18 regions due to a shortage of rheumatologists, or long traveling distances to rheumatology  
19 outpatient clinics, and as such a different system is needed to aid GPs in identifying IA. This  
20 prompted us to derive a validated rule composed of clinical characteristics that could assist  
21 GPs in decision-making for more atypical or non-classical (but nevertheless suspect)  
22 presentations of IA, as classical presentations usually don't cause GPs concern.  
23  
24  
25  
26  
27  
28  
29  
30  
31  
32  
33  
34  
35  
36  
37  
38  
39  
40

41 GPs were discouraged (both by our local communication with GPs and according to national  
42 guidelines for GPs) to perform autoantibody testing.[29] Autoantibody testing in primary care  
43 in this region was infrequent[5], unlike in other parts of the world. Autoantibody testing may  
44 falsely reassure doctors and patients, especially when results are negative, and as such we  
45 believe a model based on clinical presentation is more appropriate to facilitate rapid referral.  
46  
47  
48  
49  
50  
51  
52 Another strength is that we studied patients in whom the GPs have indicated a lack of  
53 confidence to identify the presence of synovitis. Patients with clinically obvious IA had early  
54  
55  
56  
57  
58  
59  
60

1  
2  
3 access to rheumatologic care already. This may enhance the generalizability of the present  
4 data to the setting of doubt in primary care.  
5  
6  
7

8  
9 A disadvantage of our setting is that the data were not collected in primary care itself, but in a  
10 setting intermediary between primary and secondary care. Although musculoskeletal  
11 symptoms are a very common reason for consulting primary care, suspected IA is relatively  
12 unusual, and the average full-time GP diagnoses only one new patient with RA each year.[30]  
13 Additionally, although the EARC is easily accessible on a weekly basis, the number of  
14 patients that were referred but did not visit the EARC is unknown. The prevalence of IA in  
15 patients in whom GPs are unsure about the presence of inflammatory arthritis may be lower  
16 than 41%. A study performed in primary care suggested a prevalence of 27%.[5] Based on  
17 these scarce data, we demonstrated the predictive accuracy of the model using a simulated  
18 prevalence of 20%. Because of the limitation that no other data are available on the  
19 prevalence of IA when GPs suspect IA, this estimated prevalence could be an overestimation.  
20 However, the observed data could also be an underestimation as in our setting GPs were  
21 instructed to refer patients with high suspicion/definite arthritis to the regular outpatient  
22 clinic. Further external validation in GP settings is therefore required.  
23  
24  
25  
26  
27  
28  
29  
30  
31  
32  
33  
34  
35  
36  
37  
38  
39  
40

41 GPs in our region are well informed about the importance of the early detection of IA, but we  
42 have no reason to presume that the detection skills of GPs in our region are different from  
43 that of GPs elsewhere. We expect that our rule (Clinical Arthritis Rule - CARE) might  
44 support GPs and other health care professionals in the decision-making process in patients  
45 with musculoskeletal symptoms in whom they suspect IA, regardless of the region. Of  
46 course, the consequences of an increased score will likely depend on the setting and relation  
47 with secondary care: it can either influence the decision to directly refer a patient or to first  
48  
49  
50  
51  
52  
53  
54  
55  
56  
57  
58  
59  
60

1  
2  
3 ask for additional laboratory tests (e.g. acute phase reactants or autoantibodies; Figure 4). A  
4 clinical decision aid may be of value to this end as well, as for most laboratory investigations  
5 the diagnostic accuracy depends on the prior risk. Using a simple clinical decision aid first  
6 may be more cost-effective than performing additional investigations in all patients in whom  
7 there is doubt about IA. Depending on the setting and consequences of a high score, either a  
8 sensitive method or a specific method may be preferred; for this reason cut-offs for both  
9 situations are provided. The web application facilitates implementation of the Clinical  
10 Arthritis Rule by GPs, physicians, and other health care professionals such as  
11 physiotherapists in their daily work.  
12  
13  
14  
15  
16  
17  
18  
19  
20  
21  
22  
23

## 24 **CONCLUSION**

25  
26  
27  
28 In conclusion, this study developed a clinical rule that supports the identification of patients  
29 suspected of having IA by physicians that feel insufficiently experienced in assessment of  
30 synovitis by joint examination. We hope the current data are a prelude to a data-driven  
31 method that supports GPs, physicians, and other health care professionals in decision-making  
32 in patients with suspected early IA.  
33  
34  
35  
36  
37  
38  
39  
40  
41  
42  
43  
44  
45  
46  
47  
48  
49  
50  
51  
52  
53  
54  
55  
56  
57  
58  
59  
60

1  
2  
3 **LIST OF ABBREVIATIONS**  
4  
5  
6

7 AUC = Area Under the Curve

8  
9 CARE = Clinical Arthritis Rule

10  
11 EAC = Early Arthritis Clinic

12  
13 EARC = Early Arthritis Recognition Clinic

14  
15 GPs = General Practitioners

16  
17 IA = Inflammatory Arthritis

18  
19 LUMC = Leiden University Medical Center

20  
21 MCP = Metacarpophalangeal

22  
23 NICE = National Institute for Health and Care Excellence

24  
25 RA = Rheumatoid Arthritis

26  
27 UK = United Kingdom  
28  
29  
30  
31  
32  
33  
34  
35  
36  
37  
38  
39  
40  
41  
42  
43  
44  
45  
46  
47  
48  
49  
50  
51  
52  
53  
54  
55  
56  
57  
58  
59  
60

## DECLARATIONS

### Ethics approval and consent to participate

The medical ethical committee of the Leiden University Medical Centre ("Commissie Medische Ethiek") approved the study.

### Consent for publication

Not applicable.

### Availability of data and material

The calculator presented in this paper is available online at <http://caretool.eu>. Statistical code and dataset are available from R.M. ten Brinck (e-mail; [r.m.ten\\_brinck@lumc.nl](mailto:r.m.ten_brinck@lumc.nl)) at reasonable request.

### Competing interests

The authors declare that they have no competing interests. All authors have completed the ICMJE uniform disclosure form at [www.icmje.org/coi\\_disclosure.pdf](http://www.icmje.org/coi_disclosure.pdf) and declare: no support from any organization for the submitted work; no financial relationships with any organizations that might have an interest in the submitted work; no other relationships or activities that could appear to have influenced the submitted work. The disclosure forms are available at request.

### Patient consent

Obtained.

### Funding

1  
2  
3 This work was supported by the Dutch Arthritis Foundation and a Vidi grant by the  
4 Netherlands Organization of Health Research and Development (RtB, AvdHvM). CDM is  
5 funded by the NIHR Collaborations for Leadership in Applied Health Research and Care  
6 (CLAHRC) West Midlands, the NIHR SPCR, and a NIHR Research Professorship in General  
7 Practice (NIHR-RP-2014-04-026). The funders did not have any role in the study design; the  
8 collection, analysis, and interpretation of data; the writing of the report; nor the decision to  
9 submit the paper for publication. The views and opinions expressed herein are those of the  
10 authors and do not necessarily reflect those of the NIHR (UK).  
11  
12  
13  
14  
15  
16  
17  
18  
19  
20  
21

### 22 **Authors' contributions**

23  
24 RtB, BvD, and AvdHvM designed the study. RtB, BvD, and SIC conducted the statistical  
25 analysis. RtB, BvD and AvdHvM conducted the literature search and wrote the article. All  
26 authors contributed intellectually to the writing or revising of the manuscript, and approved  
27 the final version.  
28  
29  
30  
31  
32  
33  
34

### 35 **Acknowledgements**

36  
37 We thank the involved patients research partners for their feedback on the questionnaire. The  
38 views and opinions expressed herein are those of the authors and do not necessarily reflect  
39 those of the NIHR (UK).  
40  
41  
42  
43  
44  
45  
46  
47  
48  
49  
50  
51  
52  
53  
54  
55  
56  
57  
58  
59  
60

**REFERENCES**

1. Van Nies JA, Krabben A, Schoones JW, Huizinga TW, Kloppenburg M, Van der Helm-van Mil AHM. What is the evidence for the presence of a therapeutic window of opportunity in rheumatoid arthritis? A systematic literature review. *Ann Rheum Dis*. 2014 May;73(5):861-70. doi: 10.1136/annrheumdis-2012-203130.
2. Combe B, Landewé R, Daien CI, *et al*. 2016 update of the EULAR recommendations for the management of early arthritis. *Ann Rheum Dis*. 2017 Jun;76(6):948-959. doi: 10.1136/annrheumdis-2016-210602.
3. NICE quality standard: Rheumatoid arthritis in over 16s [QS33] - Quality statement 1: Referral. [Internet] Available from: <https://www.nice.org.uk/guidance/qs33/chapter/Quality-statement-1-Referral>. [accessed on 10 May 2017].
4. Ledingham JM, British Society for Rheumatology National Audit Project. Importance of early detection and referral of rheumatoid arthritis. *BMJ*. 2016 Apr 18;353:i2172. doi: 10.1136/bmj.i2172.
5. Newsum EC, de Waal MWM, van Steenberg HW, Gussekloo J, Van der Helm-van Mil AHM. How do general practitioners identify inflammatory arthritis?—A cohort analysis of Dutch general practitioner electronic medical records. *Rheumatology (Oxford)*. 2016 May;55(5):848-53. doi: 10.1093/rheumatology/kev432
6. Emery P, Breedveld FC, Dougados M, Kalden JR, Schiff MH, Smolen JS. Early referral recommendation for newly diagnosed rheumatoid arthritis: evidence based development of a clinical guide. *Ann Rheum Dis*. 2002 Apr;61(4):290-7.
7. Mankia K, Nam J, Emery P. Identifying arthralgia suspicious for progression to rheumatoid arthritis. *Ann Rheum Dis*. 2017 Jun;76(6):e14. doi: 10.1136/annrheumdis-2016-210853.
8. National Audit Office. Services for people with rheumatoid arthritis. [Internet] Available from: <http://www.nao.org.uk/report/services-for-people-with-rheumatoid-arthritis/>. [accessed on 10 May 2017]
9. Meyfroidt S, Stevens J, De Lepeleire J, *et al*. A general practice perspective on early rheumatoid arthritis management: A qualitative study from Flanders. *Eur J Gen Pract*. 2015;21(4):231-7. doi: 10.3109/13814788.2015.1084279.
10. Raza K, Stack R, Kumar K, *et al*. Delays in assessment of patients with rheumatoid arthritis: variations across Europe. *Ann Rheum Dis*. 2011 Oct;70(10):1822-5. doi: 10.1136/ard.2011.151902.

- 1  
2  
3 11. Van der Linden MP, Le Cessie S, Raza K, *et al.* Long-term impact of delay in assessment  
4 of patients with early arthritis. *Arthritis Rheum.* 2010 Dec;62(12):3537-46. doi:  
5 10.1002/art.27692.  
6
- 7 12. Nielen MM, Spronk I, Davids R. [Incidentie en prevalentie van gezondheidsproblemen in  
8 de Nederlandse huisartsenpraktijk in 2014]. From: NIVEL Zorgregistratie Eerste Lijn  
9 [Internet]. 2017; Available from: <https://www.nivel.nl/nl/NZR/incidenties-en-prevalenties>  
10 [accessed on 10 May 2017]  
11  
12
- 13 13. Jordan KP, Kadam UT, Hayward R, Porcheret M, Young C, Croft P. Annual consultation  
14 prevalence of regional musculoskeletal problems in primary care: an observational study.  
15 *BMC Musculoskelet Disord.* 2010 Jul 2;11:144. doi: 10.1186/1471-2474-11-144.  
16
- 17 14. Jordan KP, Jöud A, Bergknut C, *et al.* International comparisons of the consultation  
18 prevalence of musculoskeletal conditions using population-based healthcare data from  
19 England and Sweden. *Ann Rheum Dis.* 2014 Jan;73(1):212-8. doi: 10.1136/annrheumdis-  
20 2012-202634.  
21  
22
- 23 15. Bell MJ, Tavares R, Guillemin F, Bykerk VP, Tugwell P, Wells GA. Development of a  
24 self-administered early inflammatory arthritis detection tool. *BMC Musculoskelet Disord.*  
25 2010 Mar 17;11:50. doi: 10.1186/1471-2474-11-50.  
26  
27
- 28 16. Tavares R, Huang S, Bykerk VP, Bell MJ. A parallel group cohort to determine the  
29 measurement properties of an early inflammatory arthritis detection tool. *Rheumatology*  
30 (*Oxford*). 2013 Nov;52(11):2077-85. doi: 10.1093/rheumatology/ket190.  
31  
32
- 33 17. Villeneuve E, Nam JL, Bell MJ, *et al.* A systematic literature review of strategies  
34 promoting early referral and reducing delays in the diagnosis and management of  
35 inflammatory arthritis. *Ann Rheum Dis.* 2013 Jan;72(1):13-22. doi: 10.1136/annrheumdis-  
36 2011-201063.  
37
- 38 18. Croydon Health Services NHS Foundation Trust. Early Inflammatory Arthritis Clinic  
39 Referral Form. [Internet] Available from:  
40 [https://www.croydonhealthservices.nhs.uk/Downloads/GP\\_resources/Referral%20and%20ser-](https://www.croydonhealthservices.nhs.uk/Downloads/GP_resources/Referral%20and%20service%20information/Arthritis/Primary%20Care%20Referral%20form%20for%20Early%20Inflammatory%20Arthritis%20Clinic.pdf)  
41 [vice%20information/Arthritis/Primary%20Care%20Referral%20form%20for%20Early%20I-](https://www.croydonhealthservices.nhs.uk/Downloads/GP_resources/Referral%20and%20service%20information/Arthritis/Primary%20Care%20Referral%20form%20for%20Early%20Inflammatory%20Arthritis%20Clinic.pdf)  
42 [nflammatory%20Arthritis%20Clinic.pdf](https://www.croydonhealthservices.nhs.uk/Downloads/GP_resources/Referral%20and%20service%20information/Arthritis/Primary%20Care%20Referral%20form%20for%20Early%20Inflammatory%20Arthritis%20Clinic.pdf). [accessed on 10 May 2017].  
43  
44
- 45 19. Hampshire Hospitals NHS Foundation Trust. New Early Arthritis Referral form.  
46 [Internet] Available from:  
47 [https://www.hampshirehospitals.nhs.uk/media/419347/early\\_arthritis\\_referral\\_additional\\_infor-](https://www.hampshirehospitals.nhs.uk/media/419347/early_arthritis_referral_additional_information.pdf)  
48 [mation.pdf](https://www.hampshirehospitals.nhs.uk/media/419347/early_arthritis_referral_additional_information.pdf). [accessed on 10 May 2017].  
49  
50
- 51 20. Musgrove Park Hospital. Early Arthritis Referral Form. [Internet] Available from:  
52 <http://www.tsft.nhs.uk/media/353049/early-arthritis-final.pdf>. [accessed on 10 May 2017].  
53  
54  
55  
56  
57  
58  
59



- 1  
2  
3 21. Hülsemann JL, Mattussek S, Siegmund-Schultze E, Zeidler H. [Early diagnosis of  
4 arthritis and spondyloarthritis within the framework of integrated health care in Lower  
5 Saxony]. *Z Rheumatol*. 2006 Feb;65(1):70-4.  
6
- 7 22. Guy's and St Thomas' NHS Foundation Trust. Early arthritis Clinic Referral Criteria.  
8 [Internet] Available from: [http://www.guysandstthomas.nhs.uk/our-](http://www.guysandstthomas.nhs.uk/our-services/rheumatology/specialties/early-arthritis/referrals.aspx#na)  
9 [services/rheumatology/specialties/early-arthritis/referrals.aspx#na](http://www.guysandstthomas.nhs.uk/our-services/rheumatology/specialties/early-arthritis/referrals.aspx#na). [accessed on 10 May  
10 2017].  
11
- 12 23. Van Nies JA, Brouwer E, Van Gaalen FA, *et al*. Improved early identification of arthritis:  
13 evaluating the efficacy of Early Arthritis Recognition Clinics. *Ann Rheum Dis*. 2013  
14 Aug;72(8):1295-301. doi: 10.1136/annrheumdis-2012-202289.  
15
- 16 24. White IR, Royston P, Wood AM. Multiple imputation using chained equations: Issues  
17 and guidance for practice. *Stat Med*. 2011 Feb 20;30(4):377-99. doi: 10.1002/sim.4067.  
18
- 19 25. Knuiman CA, Schers HJ. [Het beloop van aspecifieke artritis]. *Huisarts Wet*.  
20 2011;54(5):234-236.  
21
- 22 26. King G, Zeng L. Estimating risk and rate levels, ratios and differences in case-control  
23 studies. *Statistics in Medicine*. 2002;21(10):1409  
24
- 25 27. King G, Zeng L. Inference in Case-Control Studies. *Encyclopedia of Biopharmaceutical*  
26 *Statistics*. 2004. Available at: <https://gking.harvard.edu/files/gking/files/1s-enc.pdf>.  
27
- 28 28. Van den Bosch WB, Mangnus L, Reijnierse M, Huizinga TW, van der Helm-van Mil  
29 AHM. The diagnostic accuracy of the squeeze test to identify arthritis: a cross-sectional  
30 cohort study. *Ann Rheum Dis*. 2015 Oct;74(10):1886-9. doi: 10.1136/annrheumdis-2014-  
31 207202.  
32
- 33 29. Janssens HJEM, Lagro HAHM, Van Peet PG, *et al*. [NHG-Standaard Artritis (Eerste  
34 versie)]. *Huisarts Wet* 2009;52(9):439-53.  
35
- 36 30. Symmons D, Turner G, Webb R, *et al*. The prevalence of rheumatoid arthritis in the  
37 United Kingdom: new estimates for a new century. *Rheumatology (Oxford)*. 2002  
38 Jul;41(7):793-800.  
39  
40  
41  
42  
43  
44  
45  
46  
47  
48  
49  
50  
51  
52  
53  
54  
55  
56  
57  
58  
59  
60

**Table 1. Characteristics of patients visiting the Early Arthritis *Recognition* Clinic**

|                                                                             | Derivation (N=644) | Validation (N=644) |
|-----------------------------------------------------------------------------|--------------------|--------------------|
| Male, n (%)                                                                 | 190 (30)           | 198 (31)           |
| Age in years, mean $\pm$ SD                                                 | 52 $\pm$ 16        | 51 $\pm$ 17        |
| Symptom duration in weeks, median (IQR)                                     | 10 (3–45)          | 12 (4–45)          |
| Acute onset of symptoms *, n (%)                                            | 252 (39)           | 238 (37)           |
| Symptoms worst in the early morning, n (%)                                  | 372 (58)           | 351 (55)           |
| Morning stiffness in minutes, median (IQR)                                  | 10 (0–30)          | 10 (0–30)          |
| Number of painful joints, median (IQR)                                      | 7 (2–15)           | 6 (3–15)           |
| Number patient-reported swollen joints, median (IQR)                        | 2 (1–5)            | 2 (1–5)            |
| Difficulty with making a fist, n (%)                                        | 329 (51)           | 301 (47)           |
| Arthritis present at joint examination by experienced rheumatologist, n (%) | 271 (42)           | 252 (39)           |

**Legend:**

\* Patients were asked to define onset of symptoms; either acute onset of symptoms or gradual onset of symptoms, see S1 Appendix. Abbreviations: IQR = interquartile range; SD = standard deviation.

1 **Table 2. Univariable logistic regression in the derivation dataset with presence of**  
 2 **synovitis upon joint examination as outcome.**

|                                                         | Arthritis<br>(N=271) | No arthritis<br>(N=373) | OR (95% CI)      |
|---------------------------------------------------------|----------------------|-------------------------|------------------|
| <b>Male, n (%)</b>                                      | 104 (38)             | 86 (23)                 | 2.1 (1.5–2.9)    |
| <b>Age, n (%)</b>                                       |                      |                         |                  |
| <40                                                     | 49 (18)              | 104 (28)                | (ref)            |
| 40–59.9                                                 | 109 (40)             | 172 (46)                | 1.3 (0.89–2.0)   |
| ≥60                                                     | 113 (42)             | 97 (26)                 | 2.5 (1.6–3.8)    |
| <b>Symptom duration in weeks, n (%)</b>                 |                      |                         |                  |
| <6                                                      | 124 (46)             | 103 (28)                | 3.8 (2.4–5.9)    |
| 6–11                                                    | 38 (14)              | 62 (17)                 | 1.9 (1.1–3.9)    |
| 12–51.9                                                 | 66 (24)              | 75 (20)                 | 2.7 (1.7–4.5)    |
| ≥52                                                     | 43 (16)              | 132 (36)                | (ref)            |
| <b>Acute onset of symptoms *, n (%)</b>                 | 122 (45)             | 131 (35)                | 1.5 (1.1–2.1)    |
| <b>Symptoms worst in early morning, n (%)</b>           | 158 (58)             | 214 (57)                | 1.1 (0.69–1.6)   |
| <b>Morning stiffness &gt;60 min, n (%)</b>              | 45 (17)              | 40 (11)                 | 1.7 (1.03–2.7)   |
| <b>Number of painful joints, n (%)</b>                  |                      |                         |                  |
| 0                                                       | 1 (0)                | 10 (3)                  | (ref)            |
| 1–3                                                     | 110 (41)             | 82 (22)                 | 13.2 (1.7–105.5) |
| 4–10                                                    | 76 (28)              | 123 (33)                | 6.1 (0.77–49.0)  |
| ≥11                                                     | 84 (31)              | 158 (42)                | 5.2 (0.65–41.3)  |
| <b>Number of patient-reported swollen joints, n (%)</b> |                      |                         |                  |
| 0                                                       | 18 (7)               | 71 (19)                 | (ref)            |
| 1–3                                                     | 115 (42)             | 119 (32)                | 3.7 (2.0–6.9)    |
| 4–10                                                    | 87 (32)              | 115 (31)                | 2.9 (1.5–5.5)    |
| ≥11                                                     | 51 (19)              | 68 (18)                 | 2.9 (1.4–5.9)    |
| <b>Difficulty with making a fist, n (%)</b>             | 156 (58)             | 172 (46)                | 1.6 (1.1–2.4)    |

3

4 **Legend:**

5 \* Patients were asked to define onset of symptoms; either acute onset of symptoms or gradual  
 6 onset of symptoms, see S1 Appendix. Abbreviations: CI = confidence interval; OR = odds  
 7 ratio.

8

9 **Table 3. Multivariable logistic regression analyses with synovitis upon joint examination**  
 10 **as outcome. Model 1 includes categories of clinically applicable cut-offs; if within**  
 11 **variables several categories had similar regression coefficients, categories were pooled**  
 12 **(Model 2).**

|                                                  | Model 1             |                 | Model 2             |                 |                     |
|--------------------------------------------------|---------------------|-----------------|---------------------|-----------------|---------------------|
|                                                  | Derivation          |                 | Derivation          |                 | Validation          |
|                                                  | OR (95% CI)         |                 | OR (95% CI)         | B               | OR (95% CI)         |
| <b>Male</b>                                      | 1.7 (1.1–2.5)       |                 | 1.7 (1.1–2.5)       | 0.517           | 1.7 (1.1–2.4)       |
| <b>Age (years)</b>                               | <40                 | (ref)           | 0–59.9              | (ref)           | (ref)               |
|                                                  | 40–59.9             | 1.5 (0.96–2.5)  | ≥60                 | 2.1 (1.4–3.1)   | 0.750               |
|                                                  | ≥60                 | 2.9 (1.7–4.8)   |                     |                 | 2.1 (1.5–3.0)       |
| <b>Symptom duration (weeks)</b>                  | <6                  | 3.8 (2.3–6.4)   | <6                  | 3.6 (2.2–6.0)   | 1.279               |
|                                                  | 6–11                | 1.7 (0.92–3.1)  | 6–51.9              | 2.2 (1.4–3.6)   | 0.797               |
|                                                  | 12–51.9             | 2.9 (1.7–5.0)   | ≥52                 | (ref)           | (ref)               |
|                                                  | ≥52                 | (ref)           |                     |                 | (ref)               |
| <b>Acute onset of symptoms*</b>                  | 1.0 (0.67–1.5)      |                 | 0.99 (0.66–1.5)     | -0.015          | 1.0 (0.70–1.5)      |
| <b>Morning stiffness (minutes)</b>               | >60                 | 1.6 (0.88–2.9)  | >60                 | 1.6 (0.91–2.9)  | 0.485               |
| <b>Number of painful joints</b>                  | 0                   | (ref)           | 0                   | (ref)           | (ref)               |
|                                                  | 1–3                 | 9.3 (1.1–78.2)  | 1–3                 | 10.0 (1.2–83.4) | 2.300               |
|                                                  | 4–10                | 4.5 (0.53–37.6) | ≥4                  | 4.5 (0.54–37.1) | 1.497               |
|                                                  | ≥11                 | 3.3 (0.39–28.4) |                     |                 | 5.2 (0.61–45.1)     |
| <b>Number of patient-reported swollen joints</b> | 0                   | (ref)           | 0                   | (ref)           | (ref)               |
|                                                  | 1–3                 | 3.2 (1.6–6.4)   | ≥1                  | 3.5 (1.9–6.6)   | 1.253               |
|                                                  | 4–10                | 3.4 (1.7–7.0)   |                     |                 | 3.7 (1.9–7.0)       |
|                                                  | ≥11                 | 4.3 (1.9–10.0)  |                     |                 |                     |
| <b>Difficulty with making a fist</b>             | 1.6 (0.97–2.5)      |                 | 1.6 (0.99–2.6)      | 0.467           | 1.4 (0.91–2.2)      |
| <b>Intercept</b>                                 | -4.8                |                 |                     | -4.6            | -4.6                |
| <b>AUC</b>                                       | 0.76<br>(0.71–0.80) |                 | 0.75<br>(0.70–7.79) |                 | 0.72<br>(0.68–0.77) |

13

14 **Legend:**

1  
2  
3 15 \* Patients were asked to define onset of symptoms; either acute onset of symptoms or gradual  
4  
5 16 onset of symptoms, see S1 Appendix. Variables with p-values <0.05 in univariable analysis  
6  
7 17 in the derivation set were entered in multivariable regression analyses. Abbreviations: B =  
8  
9 18 beta; CI = confidence interval; OR = odds ratio.  
10  
11 19  
12  
13  
14  
15  
16  
17  
18  
19  
20  
21  
22  
23  
24  
25  
26  
27  
28  
29  
30  
31  
32  
33  
34  
35  
36  
37  
38  
39  
40  
41  
42  
43  
44  
45  
46  
47  
48  
49  
50  
51  
52  
53  
54  
55  
56  
57  
58  
59  
60

For peer review only

1  
2  
3  
4  
5 20 **Figure 1. The Clinical Arthritis Rule (CARE) and corresponding predicted risks of the presence of inflammatory arthritis per score.**

6  
7 21

8  
9 22 **Legend:**

10  
11 23 Observed risks of current inflammatory arthritis were obtained by calculating the proportion of patients with a positive outcome (rheumatologist-  
12  
13 24 confirmed synovitis) for each value of the risk score in the derivation dataset.  
14

15  
16 25  
17  
18  
19  
20  
21  
22  
23  
24  
25  
26  
27  
28  
29  
30  
31  
32  
33  
34  
35  
36  
37  
38  
39  
40  
41  
42  
43  
44  
45  
46  
47

1  
2  
3  
4  
5 26 **Figure 2. The Clinical Arthritis Rule (CARE) and presentation of the predicted probabilities of the presence of current inflammatory**  
6  
7 27 **arthritis based on the regression model, and the simplified score as observed in the derivation and validation datasets (A), and estimated**  
8  
9 28 **predicted probabilities in a simulation with a pre-test probability (i.e. prevalence) of inflammatory arthritis of 20% (B).**

10  
11 29  
12  
13  
14 30 **Legend:**

15  
16 31 Predicted probabilities of the final multivariable logistic regression model, fitted in the derivation set as function of the regression score (i.e. the  
17  
18 32 sum of the regression coefficients times the value of the corresponding covariates (green line)). Furthermore, for each value of the simplified  
19  
20 33 score the mean predicted probability is plotted in the derivation and validation dataset (blue and orange dots).

1  
2  
3 34 **FIGURE 3. A stylized representation of the Clinical Arthritis Rule, to be used in**  
4  
5 35 **patients in whom GPs doubt about the presence of inflammatory arthritis.**  
6

7 36

8  
9 37 **Legend:**

10  
11 38 The web application that provides predictions on the predicted risk of inflammatory arthritis  
12  
13 39 for individual patients as can be accessed at <http://caretool.eu/>  
14

15  
16 40

17  
18  
19  
20  
21  
22  
23  
24  
25  
26  
27  
28  
29  
30  
31  
32  
33  
34  
35  
36  
37  
38  
39  
40  
41  
42  
43  
44  
45  
46  
47  
48  
49  
50  
51  
52  
53  
54  
55  
56  
57  
58  
59  
60

For peer review only



1  
2  
3  
4  
5  
6  
7  
8  
9  
10  
11  
12  
13  
14  
15  
16  
17  
18  
19  
20  
21  
22  
23  
24  
25  
26  
27  
28  
29  
30  
31  
32  
33  
34  
35  
36  
37  
38  
39  
40  
41  
42  
43  
44  
45  
46  
47  
48  
49  
50  
51  
52  
53  
54  
55  
56  
57  
58  
59  
60

41 **FIGURE 4. Flowchart of decision-making in patients with suspected early IA based on**  
42 **clinical characteristics and the role of the Clinical Arthritis Rule**

43  
44

For peer review only

1  
2  
3 45 **OVERVIEW OF SUPPORTING INFORMATION**  
4

5 46

6  
7 47 **S1 Appendix. The questionnaire (in Dutch) completed by patients at the Early Arthritis**

8  
9 48 ***Recognition Clinic (EARC).***  
10

11 49

12  
13 50 **S2 Appendix. Frequencies of missing variables.**  
14

15 51

16  
17 52 **S3 Appendix. Frequency of synovitis at joint examination per number of visits per year.**  
18

19 53

20  
21 54 **S4 Appendix. Simplified model based on the derivation dataset, with arthritis upon**

22  
23 55 **examination as dependent variable using backward stepwise logistic regression.**  
24

25 56

26  
27 57 **S5 Appendix. Simplified model based on the derivation dataset, with synovitis upon**

28  
29 58 **joint examination as dependent variable.**  
30

31 59

32  
33 60 **S6 Appendix. Calibration plot showing the observed probabilities on current**

34  
35 61 **inflammatory arthritis in the derivation (A) and validation dataset (B) versus the**

36  
37 62 **predicted probabilities according to the model.**  
38

39 63

40  
41 64 **S7 Appendix. Test characteristics of the simplified model in both the derivation and**

42  
43 65 **validation dataset with presence of synovitis upon joint examination as outcome.**  
44

45 66

46  
47 67 **S8 Appendix. Receiver operator characteristics curves for the logistic regression models**

48  
49 68 **with presence of synovitis upon joint examination as outcome, showing sensitivity and**  
50

51 52

52 53

53 54

54 55

55 56

56 57

57 58

58 59

59 60

1  
2  
3  
4  
5  
6  
7  
8  
9  
10  
11  
12  
13  
14  
15  
16  
17  
18  
19  
20  
21  
22  
23  
24  
25  
26  
27  
28  
29  
30  
31  
32  
33  
34  
35  
36  
37  
38  
39  
40  
41  
42  
43  
44  
45  
46  
47  
48  
49  
50  
51  
52  
53  
54  
55  
56  
57  
58  
59  
60

69 **specificity of both regression score and simplified tool score in the derivation and**  
70 **validation dataset.**

For peer review only

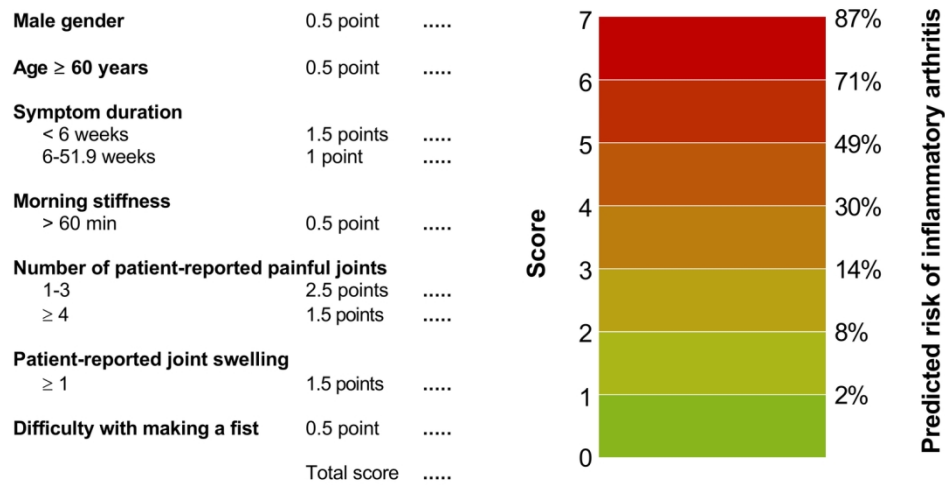

Figure 1. The Clinical Arthritis RuLE (CARE) and corresponding predicted risks of the presence of inflammatory arthritis per score.

Legend:

Observed risks of current inflammatory arthritis were obtained by calculating the proportion of patients with a positive outcome (rheumatologist-confirmed synovitis) for each value of the risk score in the derivation dataset.

143x78mm (300 x 300 DPI)

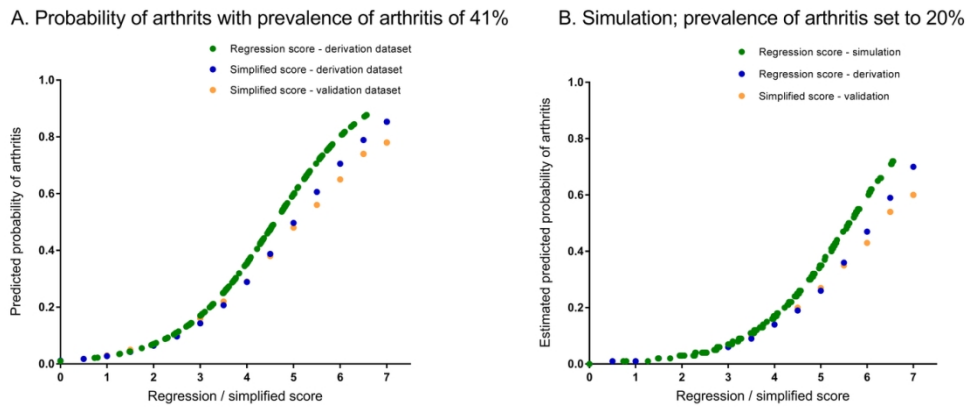

Figure 2. The Clinical Arthritis RuleE (CARE) and presentation of the predicted probabilities of the presence of current inflammatory arthritis based on the regression model, and the simplified score as observed in the derivation and validation datasets (A), and estimated predicted probabilities in a simulation with a pre-test probability (i.e. prevalence) of inflammatory arthritis of 20% (B).

Legend:

Predicted probabilities of the final multivariable logistic regression model, fitted in the derivation set as function of the regression score (i.e. the sum of the regression coefficients times the value of the corresponding covariates (green line)). Furthermore, for each value of the simplified score the mean predicted probability is plotted in the derivation and validation dataset (blue and orange dots).

122x53mm (300 x 300 DPI)

## The Clinical Arthritis RULE (CARE)

Welcome to the Clinical Arthritis RULE (CARE) calculator!

This calculator estimates the risks of the presence of inflammatory arthritis based on the research of Ten Brinck *et al.* More information on this calculator can be found at the bottom of the page. The rule is developed for use in patients in whom GPs or other physicians doubt about the presence of inflammatory arthritis. The calculator estimates the risk of the presence of synovitis, detectable at joint examination by experienced rheumatologists.

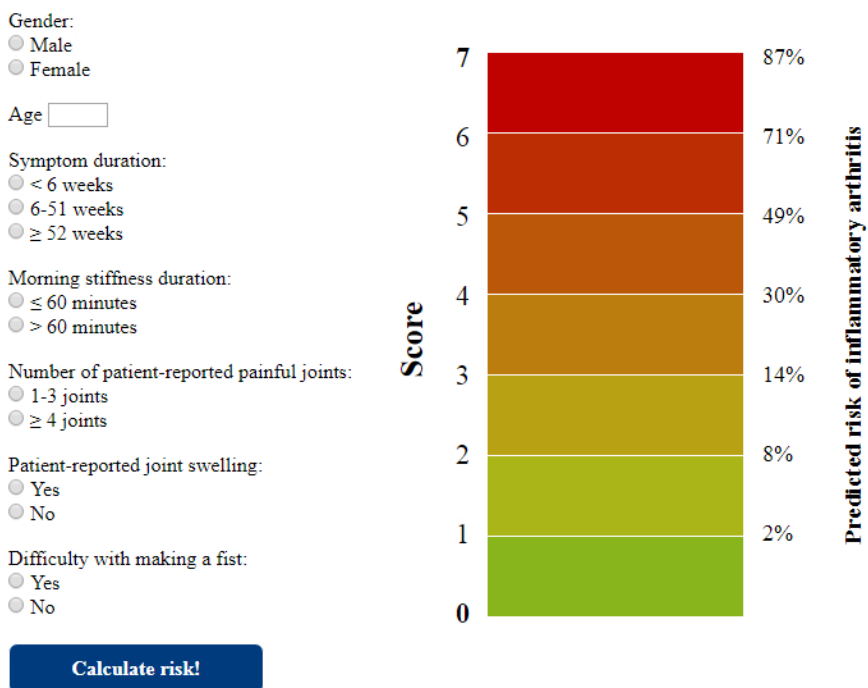

This calculator has the option to calculate the risks of current inflammatory arthritis in settings with different pre-test probabilities (i.e. prevalences). The calculator was derived and validated in patients in whom GPs suspected inflammatory arthritis and in whom inflammatory arthritis was confirmed in 41% of cases. Data obtained in (other) GP practices suggested that the pre-test risk in patient with suspected inflammatory arthritis is approximately 20%. Therefore the calculator can also estimate the risk on inflammatory arthritis in this setting.

FIGURE 3. A stylized representation of the Clinical Arthritis RULE, to be used in patients in whom GPs doubt about the presence of inflammatory arthritis.

Legend:

The web application that provides predictions on the predicted risk of inflammatory arthritis for individual patients as can be accessed at <http://caretool.eu/>

271x330mm (72 x 72 DPI)

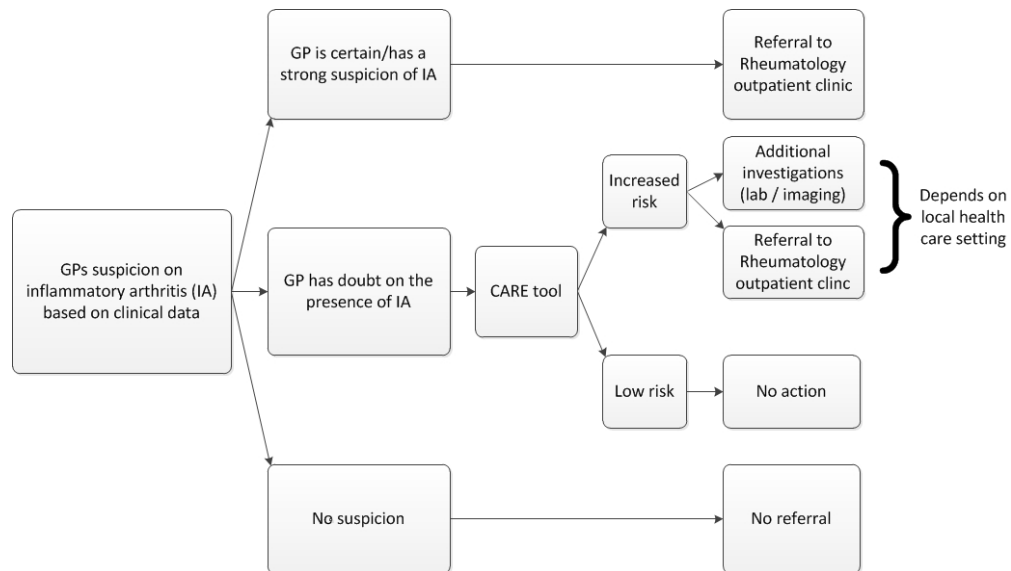

FIGURE 4. Flowchart of decision-making in patients with suspected early IA based on clinical characteristics and the role of the Clinical Arthritis Rule

274x155mm (96 x 96 DPI)

**S1 Appendix. The questionnaire (in Dutch) completed by patients at the Early Arthritis**

**Recognition Clinic (EARC).**

**EARC vragenlijst**

U komt bij de reumatoloog aan de beurt als u deze vragenlijst heeft ingevuld.

Heeft u een LUMC nummer? Zo ja: wat is uw LUMC nr:

Wat is uw geboortedatum:   -   -

Wat is uw geslacht:  vrouw  man

Wat is de datum van uw eerste klacht?   -   -

Wat is de datum van uw eerste bezoek aan de huisarts in verband met uw gewrichtsklachten?   -   -

Ontstonden uw klachten plotseling of geleidelijk?  plotseling  geleidelijk  
(kies één van de twee)

Heeft u last van stijfheid als u 's morgens opstaat?  nee  ja; hoeveel minuten?

Kost het u moeite om een vuist te maken?  nee  ja

Wanneer heeft u de meeste last van uw gewrichtsklachten? (kies één van de twee)  vroege ochtend  einde van de dag

Wilt u in de pop (in de rondjes) aankruisen in welke gewrichten u pijn heeft?

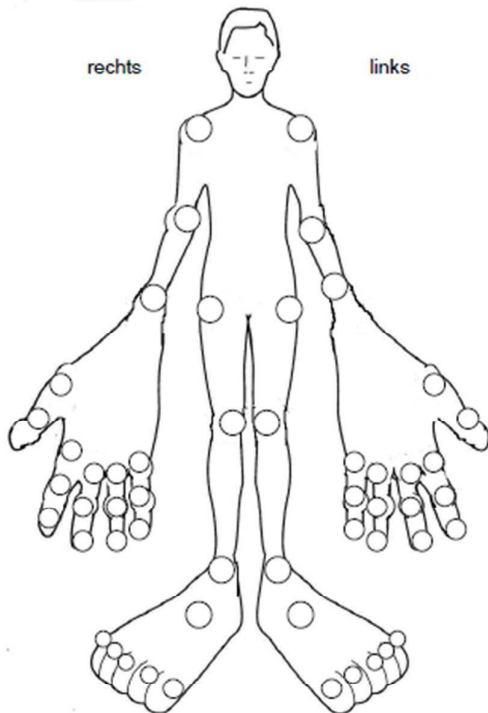

Wilt u in de pop (in de rondjes) aankruisen welke gewrichten u gezwollen vindt?

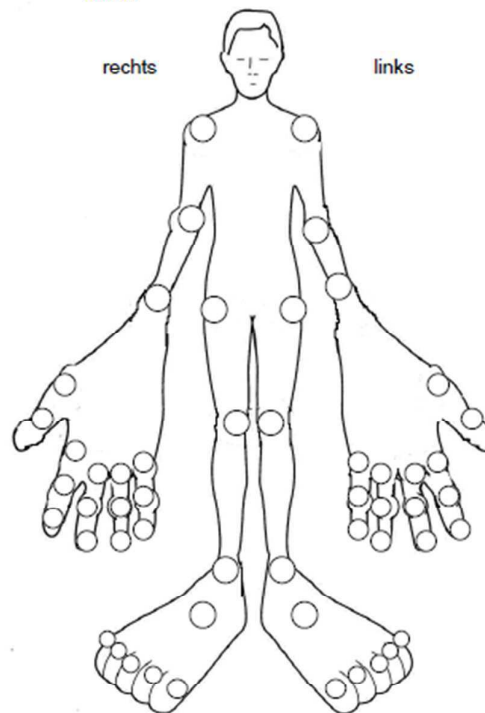

2801023769



**Legend:**

Patients filled this questionnaire at the Early Arthritis *Recognition* Clinic, before they were seen for joint examination by a rheumatologist. This version was used from April 2012 onwards. The question on 'difficulty with making a fist' and the mannequin for 'self-reported joint swelling' were added to the questionnaire at April 1st 2012 and were not included before this date. All other questions were similar before and after April 2012.

For peer review only

**S2 Appendix. Frequencies of missing variables.**

|                                      | <b>Derivation<br/>(N=644)</b> | <b>Validation<br/>(N=644)</b> |
|--------------------------------------|-------------------------------|-------------------------------|
| <b>Gender</b>                        | 0 (0)                         | 0 (0)                         |
| <b>Age</b>                           | 0 (0)                         | 0 (0)                         |
| <b>Symptom duration</b>              | 48 (8)                        | 32 (5)                        |
| <b>Acute onset of symptoms</b>       | 12 (2)                        | 17 (3)                        |
| <b>Morning stiffness in minutes</b>  | 95 (15)                       | 79 (12)                       |
| <b>Number of painful joints</b>      | 5 (1)                         | 7 (1)                         |
| <b>Number of swollen joints</b>      | 234 (36)                      | 238 (37)                      |
| <b>Difficulty with making a fist</b> | 249 (39)                      | 254 (39)                      |
| <b>Arthritis present</b>             | 0 (0)                         | 0 (0)                         |

**Legend:**

Variables are indicated as number of patients with missing data (percentage) unless otherwise indicated. Patient reported swollen-joint count and difficulty with making a fist were added to the questionnaire after April 1<sup>st</sup> 2012; therefore these missing data was completely at random.

**S3 Appendix. Frequency of synovitis per number of visits per year.**

|                                         | <b>Nr. of visits</b> | <b>Arthritis present<br/>(% of visits per year)</b> |
|-----------------------------------------|----------------------|-----------------------------------------------------|
| 2010 (starting from 31 August)          | 136                  | 61 (45)                                             |
| 2011                                    | 264                  | 103 (39)                                            |
| 2012                                    | 296                  | 132 (45)                                            |
| 2013                                    | 252                  | 105 (42)                                            |
| 2014                                    | 203                  | 72 (36)                                             |
| 2015 (up to and including 24 September) | 137                  | 50 (37)                                             |
| <b>Total</b>                            | <b>1288</b>          | <b>523 (41)</b>                                     |

**S4 Appendix. Simplified model based on the derivation dataset, with arthritis upon examination as dependent variable using backward stepwise logistic regression.**

| Step 2.                              | Derivation (N=644)        |              |
|--------------------------------------|---------------------------|--------------|
|                                      | OR (95%CI)                | B            |
| <b>Male</b>                          | 1.7 (1.1–2.4)             | 0.503        |
| <b>Age, years</b>                    |                           |              |
| 0 – 59.9                             | <i>(ref)</i>              | <i>(ref)</i> |
| ≥ 60                                 | 2.1 (1.5–3.2)             | 0.762        |
| <b>Symptom duration, weeks</b>       |                           |              |
| < 6                                  | 3.5 (2.1–5.6)             | 1.246        |
| 6–51.9                               | 2.2 (1.4–3.5)             | 0.783        |
| ≥ 52                                 | <i>(ref)</i>              | <i>(ref)</i> |
| <b>Acute onset of complaints</b>     | <i>Excluded at step 1</i> | <i>N/A</i>   |
| <b>Morning stiffness &gt;60 min</b>  | 1.7 (1.0–2.7)             | 0.523        |
| <b>Number of painful joints</b>      |                           |              |
| 0                                    | <i>(ref)</i>              | <i>(ref)</i> |
| 1–3                                  | 10.6 (1.3–87.8)           | 2.361        |
| ≥ 4                                  | 4.6 (0.56–37.7)           | 1.527        |
| <b>Number of swollen joints</b>      |                           |              |
| 0                                    | <i>(ref)</i>              | <i>(ref)</i> |
| ≥ 1                                  | 3.1 (1.7–5.6)             | 1.142        |
| <b>Difficulty with making a fist</b> | 1.5 (1.0–2.1)             | 0.372        |

**Legend:**

Abbreviations: B = beta; CI = confidence interval; OR = odds ratio.

**S5 Appendix. Simplified model based on the derivation dataset, with arthritis upon examination as dependent variable.**

| <b>Derivation (N=644)</b>            |                   |          |               |
|--------------------------------------|-------------------|----------|---------------|
|                                      | <b>OR (95%CI)</b> | <b>B</b> | <b>points</b> |
| <b>Male</b>                          | 1.7 (1.1–2.5)     | 0.517    | 0.5           |
| <b>Age, years</b>                    |                   |          |               |
| 0 – 59.9                             | (ref)             | (ref)    | 0             |
| ≥ 60                                 | 2.1 (1.4–3.1)     | 0.750    | 0.5           |
| <b>Symptom duration, weeks</b>       |                   |          |               |
| < 6                                  | 3.6 (2.2–6.0)     | 1.279    | 1.5           |
| 6–51.9                               | 2.2 (1.4–3.6)     | 0.797    | 1             |
| ≥ 52                                 | (ref)             | (ref)    | 0             |
| <b>Acute onset of complaints</b>     | 0.99 (0.66–1.5)   | -0.015   | 0             |
| <b>Morning stiffness &gt;60 min</b>  | 1.6 (0.91–2.9)    | 0.485    | 0.5           |
| <b>Number of painful joints</b>      |                   |          |               |
| 0                                    | (ref)             | (ref)    | 0             |
| 1–3                                  | 10.0 (1.2–83.4)   | 2.300    | 2.5           |
| ≥ 4                                  | 4.5 (0.54–37.1)   | 1.497    | 1.5           |
| <b>Number of swollen joints</b>      |                   |          |               |
| 0                                    | (ref)             | (ref)    | 0             |
| ≥ 1                                  | 3.5 (1.9–6.6)     | 1.253    | 1.5           |
| <b>Difficulty with making a fist</b> | 1.6 (0.99–2.6)    | 0.467    | 0.5           |

**Legend:**

Abbreviations: B = beta; CI = confidence interval; OR = odds ratio.

S6 Appendix. Calibration plot showing the observed probabilities on current inflammatory arthritis in the derivation (A) and validation dataset (B) versus the predicted probabilities according to the model.

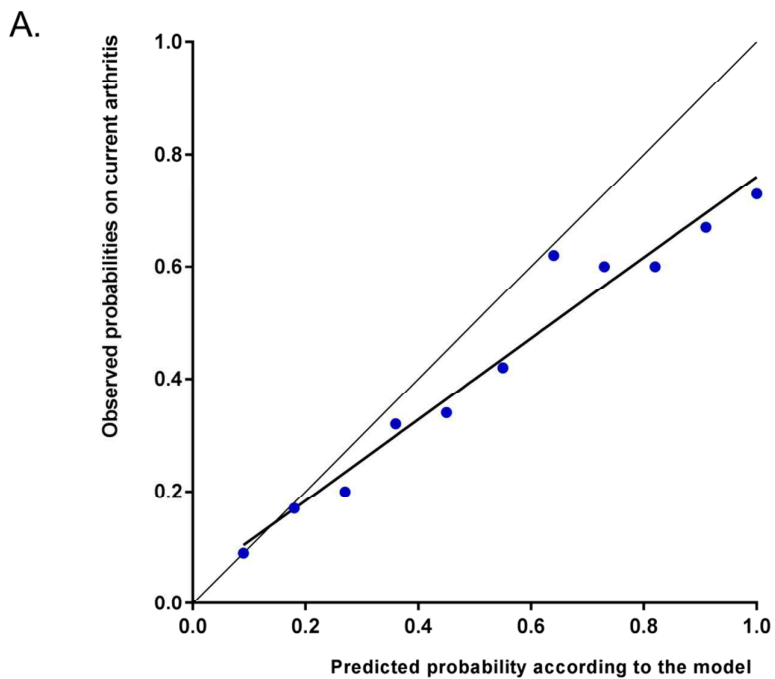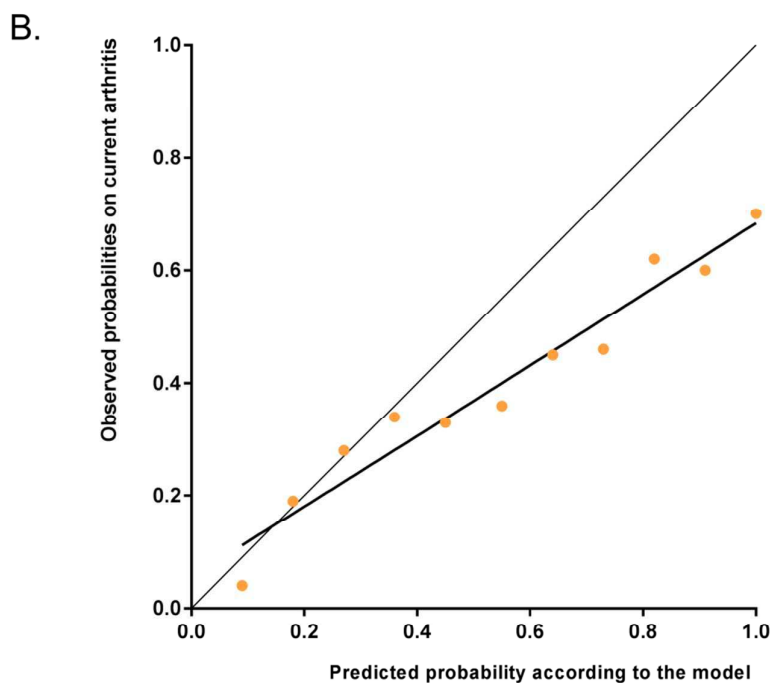

Legend:

1  
2  
3 Predicted probabilities using the final fitted multivariable model in the validation dataset  
4  
5 were partitioned in 10 equally sized groups. In each group, the average predicted probability  
6  
7 on inflammatory arthritis was compared with observed prevalence of inflammatory arthritis  
8  
9 in the validation dataset. Regression lines were fitted to the calibration plot and revealed a  
10  
11 coefficient of 0.73 and an intercept of 0.03 in the derivation dataset and a coefficient of 0.62  
12  
13 and an intercept of 0.061 in the validation dataset.  
14  
15  
16  
17  
18  
19  
20  
21  
22  
23  
24  
25  
26  
27  
28  
29  
30  
31  
32  
33  
34  
35  
36  
37  
38  
39  
40  
41  
42  
43  
44  
45  
46  
47  
48  
49  
50  
51  
52  
53  
54  
55  
56  
57  
58  
59  
60

For peer review only

**S7 Appendix. Test characteristics of the simplified model in both the derivation and validation dataset with presence of synovitis upon joint examination as outcome.**

| Cut-off<br>( $\geq$ ) | Derivation (N=644) |                    | Validation (N=644) |                    |
|-----------------------|--------------------|--------------------|--------------------|--------------------|
|                       | Sensitivity<br>(%) | Specificity<br>(%) | Sensitivity<br>(%) | Specificity<br>(%) |
| 1                     | 100                | 0.8                |                    |                    |
| 2                     | 99.9               | 3.3                | 99.5               | 1.5                |
| 3                     | 98.7               | 7.7                | 99.3               | 7.8                |
| 4                     | 93.6               | 35.6               | 90.8               | 35.9               |
| 4.5                   | 85.8               | 52.8               | 78.1               | 50.0               |
| 5                     | 67.6               | 68.0               | 63.9               | 67.0               |
| 5.5                   | 45.0               | 82.7               | 43.5               | 83.4               |
| 6                     | 23.1               | 92.1               | 21.6               | 92.8               |
| 7                     | 2.5                | 99.4               | 2.1                | 99.7               |

**Legend:**

Sensitivity was obtained by calculating the probability that the Clinical Arthritis Rule indicated 'disease' positive among those actually identified with inflammatory by the rheumatologist. Specificity was obtained by calculating the fraction of those without inflammatory arthritis that had a negative test result on the Clinical Arthritis Rule.



1  
2  
3 **S8 Appendix. Receiver operator characteristics curves for the logistic regression models**  
4 **with presence of synovitis upon joint examination as outcome, showing sensitivity and**  
5 **specificity of both regression score and simplified tool score in the derivation and**  
6 **validation dataset.**  
7  
8  
9

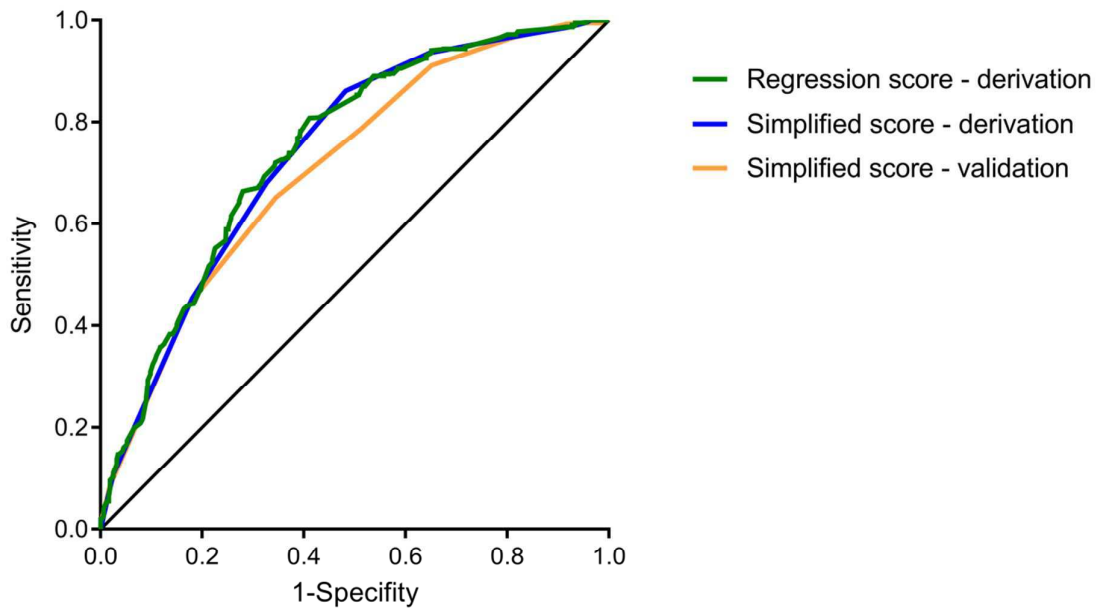

**Legend:**

The Area Under Receiver Operator Curve (AUC) for the different models was: for the regression model in the derivation dataset 0.75 (95%CI 0.70–0.79), for the simplified score in the derivation dataset 0.74 (95%CI 0.70–0.78), and for the simplified score in the validation dataset 0.71 (95%CI 0.67–0.75).

STROBE Statement—Checklist of items that should be included in reports of *cross-sectional studies*

|                              | Item No | Recommendation                                                                                                                                                                                                                                                                                                                                                                                                                                                                                                                   |
|------------------------------|---------|----------------------------------------------------------------------------------------------------------------------------------------------------------------------------------------------------------------------------------------------------------------------------------------------------------------------------------------------------------------------------------------------------------------------------------------------------------------------------------------------------------------------------------|
| <b>Title and abstract</b>    | 1       | (a) Indicate the study's design with a commonly used term in the title or the abstract<br><b>[The design of the study is described in the abstract, see Page 2; Methods and Findings]</b><br><br>(b) Provide in the abstract an informative and balanced summary of what was done and what was found<br><b>[Page 2; Methods and Findings]</b>                                                                                                                                                                                    |
| <b>Introduction</b>          |         |                                                                                                                                                                                                                                                                                                                                                                                                                                                                                                                                  |
| Background/rationale         | 2       | Explain the scientific background and rationale for the investigation being reported<br><b>[Page 4-5; Introduction describes that scientific background]</b>                                                                                                                                                                                                                                                                                                                                                                     |
| Objectives                   | 3       | State specific objectives, including any prespecified hypotheses<br><b>[Page 5; Introduction. "We have developed and validated a rule composed of clinical characteristics (...) which may assist in the decision-making process in patients with musculoskeletal symptoms with suspected IA at other places, in order to promote early identification of IA."]</b>                                                                                                                                                              |
| <b>Methods</b>               |         |                                                                                                                                                                                                                                                                                                                                                                                                                                                                                                                                  |
| Study design                 | 4       | Present key elements of study design early in the paper<br><b>[Page 5-10; Methods.]</b>                                                                                                                                                                                                                                                                                                                                                                                                                                          |
| Setting                      | 5       | Describe the setting, locations, and relevant dates, including periods of recruitment, exposure, follow-up, and data collection<br><b>[Page 5-7; Methods. Setting: "the Early Arthritis Recognition Clinic" at the "Leiden University Medical Center". Relevant dates: "All patients that visited the EARC between 2010 and September 2015 were studied." Data collection: "At the EARC, patients completed a short questionnaire about their joint symptoms, after which they were seen by an experienced rheumatologist."]</b> |
| Participants                 | 6       | (a) Give the eligibility criteria, and the sources and methods of selection of participants<br><b>[Page 5,6; Methods, section Study population]</b>                                                                                                                                                                                                                                                                                                                                                                              |
| Variables                    | 7       | Clearly define all outcomes, exposures, predictors, potential confounders, and effect modifiers. Give diagnostic criteria, if applicable<br><b>[Page 7-9; Methods, sections Data collection and Derivation and validation of the model]</b>                                                                                                                                                                                                                                                                                      |
| Data sources/<br>measurement | 8*      | For each variable of interest, give sources of data and details of methods of assessment (measurement). Describe comparability of assessment methods if there is more than one group<br><b>[Page 7-9; Methods, sections Data collection and Derivation and validation of the model]</b>                                                                                                                                                                                                                                          |
| Bias                         | 9       | Describe any efforts to address potential sources of bias<br><b>[Page 7; Methods, section Derivation and validation of the model.]</b>                                                                                                                                                                                                                                                                                                                                                                                           |
| Study size                   | 10      | Explain how the study size was arrived at<br><b>[Page 10; Results: "1,288 patients in whom GPs were unsure about the presence of IA visited the EARC between 2010 and 2015"]</b>                                                                                                                                                                                                                                                                                                                                                 |
| Quantitative variables       | 11      | Explain how quantitative variables were handled in the analyses. If applicable, describe which groupings were chosen and why<br><b>[Page 7-9; Methods, section Derivation and validation of the model]</b>                                                                                                                                                                                                                                                                                                                       |
| Statistical methods          | 12      | (a) Describe all statistical methods, including those used to control for confounding                                                                                                                                                                                                                                                                                                                                                                                                                                            |

|                   |     |                                                                                                                                                                                                                                                                                                                                                  |
|-------------------|-----|--------------------------------------------------------------------------------------------------------------------------------------------------------------------------------------------------------------------------------------------------------------------------------------------------------------------------------------------------|
|                   |     | <b>[Page 7–9; Methods, section Derivation and validation of the model]</b>                                                                                                                                                                                                                                                                       |
|                   |     | (b) Describe any methods used to examine subgroups and interactions                                                                                                                                                                                                                                                                              |
|                   |     | <b>[N/A]</b>                                                                                                                                                                                                                                                                                                                                     |
|                   |     | (c) Explain how missing data were addressed                                                                                                                                                                                                                                                                                                      |
|                   |     | <b>[Page 7; Methods: “To prevent exclusion of patients with one or more missing variables, we imputed missing values using chained equations.”]</b>                                                                                                                                                                                              |
|                   |     | (d) If applicable, describe analytical methods taking account of sampling strategy                                                                                                                                                                                                                                                               |
|                   |     | <b>[N/A]</b>                                                                                                                                                                                                                                                                                                                                     |
|                   |     | (e) Describe any sensitivity analyses                                                                                                                                                                                                                                                                                                            |
|                   |     | <b>[N/A]</b>                                                                                                                                                                                                                                                                                                                                     |
| <b>Results</b>    |     |                                                                                                                                                                                                                                                                                                                                                  |
| Participants      | 13* | (a) Report numbers of individuals at each stage of study—eg numbers potentially eligible, examined for eligibility, confirmed eligible, included in the study, completing follow-up, and analysed<br><b>[Page 10; Results: “1,288 patients in whom GPs were unsure about the presence of IA visited the EARC between 2010 and 2015”]</b>         |
|                   |     | (b) Give reasons for non-participation at each stage                                                                                                                                                                                                                                                                                             |
|                   |     | <b>[N/A]</b>                                                                                                                                                                                                                                                                                                                                     |
|                   |     | (c) Consider use of a flow diagram                                                                                                                                                                                                                                                                                                               |
|                   |     | <b>[N/A]</b>                                                                                                                                                                                                                                                                                                                                     |
| Descriptive data  | 14* | (a) Give characteristics of study participants (eg demographic, clinical, social) and information on exposures and potential confounders<br><b>[Page 10; Table 1]</b>                                                                                                                                                                            |
|                   |     | (b) Indicate number of participants with missing data for each variable of interest<br><b>[S2 Appendix]</b>                                                                                                                                                                                                                                      |
| Outcome data      | 15* | Report numbers of outcome events or summary measures<br><b>[Page 11 and S3 Appendix; “41% had synovitis at joint examination”]</b>                                                                                                                                                                                                               |
| Main results      | 16  | (a) Give unadjusted estimates and, if applicable, confounder-adjusted estimates and their precision (eg, 95% confidence interval). Make clear which confounders were adjusted for and why they were included<br><b>[Page 10–11; Table 2; Table 3]</b>                                                                                            |
|                   |     | (b) Report category boundaries when continuous variables were categorized<br><b>[Page 7–8; 10–11; Table 2; Table 3]</b>                                                                                                                                                                                                                          |
|                   |     | (c) If relevant, consider translating estimates of relative risk into absolute risk for a meaningful time period                                                                                                                                                                                                                                 |
|                   |     | <b>[N/A]</b>                                                                                                                                                                                                                                                                                                                                     |
| Other analyses    | 17  | Report other analyses done—eg analyses of subgroups and interactions, and sensitivity analyses<br><b>[N/A]</b>                                                                                                                                                                                                                                   |
| <b>Discussion</b> |     |                                                                                                                                                                                                                                                                                                                                                  |
| Key results       | 18  | Summarise key results with reference to study objectives<br><b>[Page 12–13; Discussion]</b>                                                                                                                                                                                                                                                      |
| Limitations       | 19  | Discuss limitations of the study, taking into account sources of potential bias or imprecision. Discuss both direction and magnitude of any potential bias<br><b>[Page 14–15; “A disadvantage of our setting is that the data were not collected in primary care itself, but in a setting intermediary between primary and secondary care.”]</b> |
| Interpretation    | 20  | Give a cautious overall interpretation of results considering objectives, limitations,                                                                                                                                                                                                                                                           |

multiplicity of analyses, results from similar studies, and other relevant evidence  
**[Page 15–16; “In conclusion, this study developed a clinical rule that supports the identification of patients suspected of having IA by physicians that feel insufficiently experienced in assessment of synovitis by joint examination.”]**

---

|                  |    |                                                                                                                                                                                                                                                                                                                                                       |
|------------------|----|-------------------------------------------------------------------------------------------------------------------------------------------------------------------------------------------------------------------------------------------------------------------------------------------------------------------------------------------------------|
| Generalizability | 21 | Discuss the generalizability (external validity) of the study results<br><b>[Page 15–16; “(...)We expect that our rule (Clinical Arthritis Rule - CARE) might support GPs and other health care professionals in the decision-making process in patients with musculoskeletal symptoms in whom they suspect IA, regardless of the region. (...)”]</b> |
|------------------|----|-------------------------------------------------------------------------------------------------------------------------------------------------------------------------------------------------------------------------------------------------------------------------------------------------------------------------------------------------------|

---

#### **Other information**

---

|         |    |                                                                                                                                                                                                                        |
|---------|----|------------------------------------------------------------------------------------------------------------------------------------------------------------------------------------------------------------------------|
| Funding | 22 | Give the source of funding and the role of the funders for the present study and, if applicable, for the original study on which the present article is based<br><b>[Entered through the online submission system]</b> |
|---------|----|------------------------------------------------------------------------------------------------------------------------------------------------------------------------------------------------------------------------|

---

\*Give information separately for exposed and unexposed groups.

**Note:** An Explanation and Elaboration article discusses each checklist item and gives methodological background and published examples of transparent reporting. The STROBE checklist is best used in conjunction with this article (freely available on the Web sites of PLoS Medicine at <http://www.plosmedicine.org/>, Annals of Internal Medicine at <http://www.annals.org/>, and Epidemiology at <http://www.epidem.com/>). Information on the STROBE Initiative is available at [www.strobe-statement.org](http://www.strobe-statement.org).

# BMJ Open

## Development and validation of a clinical rule for recognition of early inflammatory arthritis

|                                 |                                                                                                                                                                                                                                                                                                                                                                                                                                                                                                                                                                                                                                                           |
|---------------------------------|-----------------------------------------------------------------------------------------------------------------------------------------------------------------------------------------------------------------------------------------------------------------------------------------------------------------------------------------------------------------------------------------------------------------------------------------------------------------------------------------------------------------------------------------------------------------------------------------------------------------------------------------------------------|
| Journal:                        | <i>BMJ Open</i>                                                                                                                                                                                                                                                                                                                                                                                                                                                                                                                                                                                                                                           |
| Manuscript ID                   | bmjopen-2018-023552.R1                                                                                                                                                                                                                                                                                                                                                                                                                                                                                                                                                                                                                                    |
| Article Type:                   | Research                                                                                                                                                                                                                                                                                                                                                                                                                                                                                                                                                                                                                                                  |
| Date Submitted by the Author:   | 08-Aug-2018                                                                                                                                                                                                                                                                                                                                                                                                                                                                                                                                                                                                                                               |
| Complete List of Authors:       | ten Brinck, Robin; Leiden University Medical Centre, Rheumatology van Dijk, Bastiaan; Leiden University Medical Centre, Rheumatology van Steenberg, Hanna; Leiden University Medical Centre, Rheumatology le Cessie, S; Leids Universitair Medisch Centrum, Numans, Mattijs; Leiden University Medical Centre, Department of Public Health and Primary Care Hider, Samantha; Keele University, Arthritis Research UK Primary Care Centre; Haywood Academic Rheumatology Centre, Rheumatology Mallen, Christian; Keele University, Arthritis Research UK Primary Care Centre van der Helm-van Mil, Annette; Leiden University Medical Center, Rheumatology |
| <b>Primary Subject Heading</b>: | Rheumatology                                                                                                                                                                                                                                                                                                                                                                                                                                                                                                                                                                                                                                              |
| Secondary Subject Heading:      | General practice / Family practice, Epidemiology                                                                                                                                                                                                                                                                                                                                                                                                                                                                                                                                                                                                          |
| Keywords:                       | inflammatory arthritis, general practitioners, early recognition, clinical decision rule, rheumatoid arthritis                                                                                                                                                                                                                                                                                                                                                                                                                                                                                                                                            |
|                                 |                                                                                                                                                                                                                                                                                                                                                                                                                                                                                                                                                                                                                                                           |

SCHOLARONE™  
Manuscripts

1  
2  
3 *Research Article*

4  
5 **Development and validation of a clinical rule for recognition of early**  
6  
7  
8 **inflammatory arthritis**  
9

10  
11  
12 Short title: A clinical rule that supports identification of patients suspected of having IA  
13

14  
15  
16 Robin M. ten Brinck\* *MD*<sup>1</sup>, Bastiaan T. van Dijk\* *BSc*<sup>1</sup>, Hanna W. van Steenberghe *MD*<sup>1</sup>,

17  
18 Saskia le Cessie *PhD*<sup>2</sup>, Mattijs E. Numans *MD, PhD*<sup>3</sup>, Samantha L. Hider *MD, PhD*<sup>4,5</sup>

19  
20  
21 Christian Mallen *MD, PhD*<sup>4</sup>, Annette van der Helm-van Mil *MD, PhD*<sup>1</sup>

22  
23 \* both contributed equally  
24

- 25  
26  
27 1. Department of Rheumatology, Leiden University Medical Centre, Leiden, The  
28 Netherlands.  
29  
30 2. Department of Epidemiology and Statistics, Leiden University Medical Centre,  
31 Leiden, The Netherlands.  
32  
33 3. Department of Public Health and Primary Care, Leiden University Medical Centre,  
34 Leiden, Netherlands.  
35  
36 4. Research Institute for Primary Care and Health Sciences, Keele University,  
37 Newcastle, United Kingdom.  
38  
39 5. Haywood Academic Rheumatology Centre, Haywood Hospital, Stoke-on-Trent,  
40 Staffordshire, United Kingdom.  
41  
42  
43

44 **Address of correspondence:**

45 R.M. ten Brinck, MD,

46 Department of Rheumatology C1-R, Leiden University Medical Centre,

47 PO Box 9600, Leiden 2300RC, the Netherlands.

48 Telephone: 0031 71 5265655,

49 E-mail: [r.m.ten\\_brinck@lumc.nl](mailto:r.m.ten_brinck@lumc.nl)  
50  
51  
52  
53  
54  
55  
56  
57  
58  
59  
60

## ABSTRACT

*Objectives:* National and international guidelines recommend prompt referral of patients presenting with inflammatory arthritis (IA), but general practitioners (GPs) feel uncertain in their proficiency to detect synovitis through joint examination, the method of choice to identify IA. Our objective was to develop and validate a rule composed of clinical characteristics to assist GPs and other physicians in identifying IA when in doubt.

*Design:* Split-sample derivation and validation study.

*Setting:* The Leiden Early Arthritis Recognition Clinic (EARC); a screening clinic for patients in whom GPs suspected but were unsure of the presence of IA.

*Participants:* 1,288 consecutive patients visiting the EARC .

*Primary and secondary outcome measures:* Associations of clinical characteristics with presence of IA were determined using logistic regression in 644 patients, while validating the results in the other 644 patients (split-sample validation). To facilitate application in clinical practice, a simplified rule (with scores ranging 0 to 7.5) was derived and validated.

*Results:* IA was identified by a rheumatologist in 41% of patients. In univariable analysis, male gender, age  $\geq 60$  years, symptom duration  $< 6$  weeks, morning stiffness  $> 60$  minutes, a low number of painful joints (1-3 joints), presence of patient-reported joint swelling, and difficulty with making a fist were associated with IA in the derivation dataset. Using multivariable analysis, a simplified rule consisting of these seven items was derived and validated, yielding an Area Under the Receiver Operator Characteristic curve (AUC) of 0.74 (95%CI 0.70-0.78) in the derivation dataset. Validation yielded an AUC of 0.71 (95%CI 0.67-0.75). Finally, the model was repeated to study predicted probabilities with a lower prevalence of inflammatory arthritis to simulate performance in primary care settings.

1  
2  
3 *Conclusions:* Our rule, composed of clinical parameters, had reasonable discriminative ability  
4  
5 for IA and could assist physicians in decision-making in patients with suspected IA,  
6  
7 increasing appropriateness of health care utilization.  
8  
9  
10  
11  
12

13 **KEYWORDS:**

14  
15 Inflammatory Arthritis, General Practitioners, Early Recognition, Clinical Decision Rule,  
16  
17 Rheumatoid Arthritis  
18  
19  
20  
21  
22  
23  
24  
25  
26  
27  
28  
29  
30  
31  
32  
33  
34  
35  
36  
37  
38  
39  
40  
41  
42  
43  
44  
45  
46  
47  
48  
49  
50  
51  
52  
53  
54  
55  
56  
57  
58  
59  
60



### Strengths and limitations of this study

- A clinical rule could help to select patients to refer for additional investigations (laboratory or imaging) or to secondary care. This could promote early identification of inflammatory arthritis and increase appropriateness of health care utilization.
- Data were collected prospectively in a population of patients in which general practitioners had doubt on the presence of inflammatory arthritis.
- The main limitation is that data were not collected in primary care itself, but in a setting intermediary between primary and secondary care. Further external validation in GP settings is therefore required.

## BACKGROUND

Early initiation of disease modifying anti-rheumatic drugs is strongly associated with improved outcomes of rheumatoid arthritis (RA).[1] National and international guidelines attempt to facilitate this by emphasizing prompt referral of patients presenting with inflammatory arthritis (IA) to a rheumatologist. The European League Against Rheumatism (EULAR) taskforce for the management of early IA recommends referral within 6 weeks of onset of symptoms[2], while in the United Kingdom (UK) the National Institute for Health and Care Excellence (NICE) guidelines advises referral to a rheumatologist in patients with new, persistent (>3–4 weeks) synovitis within three working days.[3] However, it was demonstrated that this referral timeline is achieved in only 17% of patients.[4] On average, RA patients are seen four (and sometimes more than eight) times by general practitioners (GPs) before they refer to secondary care[5-8], which may reflect the difficulty of differentiating patients with early IA from patients with other types of common musculoskeletal symptoms. A recent qualitative study revealed that GPs acknowledge the importance of early detection and referral, but feel uncertain in their proficiency to detect synovitis through joint examination, the method of choice to identify IA.[2,9] As a consequence, the referral to a rheumatologist may be delayed, which contributes to overall treatment delay in early RA, as observed in Europe.[10,11]

This is further complicated by the high incidence of consultations for various common musculoskeletal symptoms and the low incidence of early IA in primary care.[12] The consultation prevalence of any musculoskeletal symptom in primary care in the UK approximates 2405 per 10,000 per year [13], making it the most common organ system consulted for at GP practices.[12-14] Although musculoskeletal symptoms are common, GPs

1  
2  
3 suspect IA (based on pattern recognition) in only a very small minority of patients.[5] In  
4 these patients, GPs often lack confidence in joint assessment for synovitis.  
5  
6  
7

8  
9 To support early detection, several initiatives have been developed, including triage systems.  
10 The best studied triage system (the Early Inflammatory Arthritis Questionnaire) was  
11 developed and validated for patients attending secondary and tertiary care.[15-17]  
12  
13 Furthermore, several referral guidelines for GPs[6,18-22], and public awareness campaigns  
14 have been developed, for instance one attempting to simplify pattern recognition to the “S-  
15 Factor”: Stiffness, Swelling, Squeezing. However, none of these initiatives were designed  
16 using primary care data, and all assume that GPs can differentiate between the presence and  
17 absence of joint swelling[6,18-20], which continues to be a barrier to the early detection of  
18 IA.  
19  
20  
21  
22  
23  
24  
25  
26  
27  
28  
29  
30

31 Altogether there is a contradiction with the need to refer as quickly as possible while  
32 evidence who must be referred or, in line with this, in whom additional investigations are  
33 appropriate is lacking. To solve the issue, we have developed and validated a rule composed  
34 of clinical characteristics, by taking advantage of data from a setting intermediate between  
35 primary and secondary care. This intermediate setting of an the Early Arthritis *Recognition*  
36 Clinic was a local solution to promote early referrals and is not easy implementable in other  
37 regions. The clinical rule derived from these data however, is easy to apply and may assist in  
38 the decision-making process in patients with musculoskeletal symptoms with suspected IA at  
39 other places, in order to promote early identification of IA.  
40  
41  
42  
43  
44  
45  
46  
47  
48  
49  
50

## 51 52 **METHODS** 53 54 55 56 57 58 59 60

### Study population

To promote early recognition of early IA, the Early Arthritis *Recognition* Clinic (EARC) was initiated in September 2010 in Leiden, the Netherlands. The outpatient clinic of the department of Rheumatology of the Leiden University Medical Centre (LUMC) is the only referral centre in a healthcare region of ~400,000 people. GPs were instructed to refer patients to the EARC in whom they were unsure about the presence of IA (instead of a ‘wait-and-see’ approach or performing additional tests). The EARC system has reduced referral delay from 8 to 2 weeks, and improved early identification of IA.[11,23] To emphasize the importance of early identification of IA and aiming to inform on the purpose of the EARC, a region-wide educational campaign was conducted among regional GPs.

In addition to (and distinct from) the EARC, the LUMC also has an Early Arthritis Clinic (EAC). The EAC was established in 1993 to include and follow patients with early arthritis and to offer the possibility of rapid access to rheumatology care, usually within a week of referral. To differentiate between the clinics, GPs were instructed to refer to the EAC if there was a clear synovitis or very high suspicion of IA (i.e. to continue as they had before, since there was no benefit for such patients to go the EARC first) and to refer to the EARC when in doubt about the presence of IA (i.e. to not ‘wait-and-see’ or order additional tests). Thus, patients included in this study represent the difficult group in whom GPs were uncertain of the presence of suspected IA; patients with a very high degree of suspicion were referred directly to the EAC.

The EARC screening clinic was held twice a week between 2010–2014 and once a week from 2014 onwards. After GP referral, patients can visit the EARC without an appointment. All patients that visited the EARC between 2010 and September 2015 were studied.

## Data collection

At the EARC, patients completed a short questionnaire about their joint symptoms, after which they were seen by an experienced rheumatologist (AvdHvM or other senior rheumatologists) who performed a full 66-joint examination. If synovitis was determined by physical examination, patients were fast-tracked to visit the EAC within 1 week for further evaluation and treatment. Patients without IA were discharged to primary care. The questionnaire completed by patients, provided in S1 Appendix, contained questions on age, gender, date of symptom onset, date of first visit to GP, presence of a (sub)acute symptom onset (versus a gradual symptom-onset), morning stiffness (duration in minutes), which part of the day symptoms were worst, and whether they had difficulty with making a fist. Patients were asked to indicate on a 52-joint mannequin which joints were painful and which joints they considered to be swollen. IA, defined as synovitis confirmed by the rheumatologist at physical examination, was used as outcome.

Collected data was anonymized and entered in a research database at chronological order of visiting the EARC. The local medical ethical committee approved this study.

## Derivation and validation of the model

We used half of the dataset for derivation and the other half for validation of results (split-sample validation). To prevent bias by (unknown) effects of inclusion period, patients with odd ID-numbers (1,3,etc) were included in the derivation dataset and those with even ID-numbers (2,4,etc) were used for validation.

1  
2  
3 To prevent exclusion of patients with one or more missing variables, we imputed missing  
4 values using chained equations[24]; frequencies of missing variables are presented in S2  
5 Appendix. The variables ‘difficulty with making a fist’ and ‘self-reported joint swelling’  
6 were most frequently missing as these were added to the questionnaire after April 1<sup>st</sup> 2012,  
7 thus absence of these data was considered to occur completely at random.  
8  
9  
10  
11  
12

13  
14  
15 We conducted logistic regression analysis modelling with presence of IA (defined as  
16 rheumatologist-confirmed synovitis on physical examination) as dependent variable.  
17  
18 Continuous variables were categorized using clinically relevant cut-offs: age: <40 / 40–59.9 /  
19 ≥60 years; duration of symptoms: <6 / 6–11 / 12–51.9 / ≥52 weeks; duration of morning  
20 stiffness: ≤60 / >60 minutes; number of painful joints: 0 / 1–3 / 4–10 / ≥11; number of  
21 swollen joints: 0 / 1–3 / 4–10 / ≥11. We performed univariable logistic regression to evaluate  
22 associations between dependent variables and presence of IA. Variables with p-values <0.05  
23 in univariable analyses were entered in multivariable regression analyses (enter model) to  
24 obtain a model with a small number of variables. If several categories within a variable had  
25 similar regression coefficients in multivariable modelling, we pooled these categories and  
26 repeated the analysis. In sub-analysis, we also performed a multivariable logistic regression  
27 model with the pooled categories using backward selection.  
28  
29  
30  
31  
32  
33  
34  
35  
36  
37  
38  
39  
40  
41  
42  
43

44 To obtain a simplified rule applicable in daily care, we rounded the regression coefficients of  
45 the final multivariable logistic regression model to the nearest 0.5 (irrespective of p-value).  
46 This resulted in an easily calculable risk score. For each value of the risk score, we  
47 determined test characteristics (i.e. sensitivity and specificity) and predicted probabilities of  
48 the presence of inflammatory arthritis.  
49  
50  
51  
52  
53  
54  
55  
56  
57  
58  
59  
60

1  
2  
3 We evaluated the overall discriminative ability of the models using the Area Under the  
4 Receiver Operating Characteristic curve (AUC). The model's calibration was assessed by  
5 generating a calibration plot to measure goodness of fit, where the data was partitioned in 10  
6 equally sized groups based on the predicted probabilities using the final fitted multivariable  
7 model. In each group, the average predicted probability on current IA was compared with the  
8 observed prevalence, both in the derivation and validation dataset. Additionally, the Hosmer-  
9 Lemeshow statistic was calculated.  
10  
11  
12  
13  
14  
15  
16  
17  
18  
19

20 To estimate performance of our simplified rule in a setting with a different prevalence of IA  
21 (e.g. primary care), a simulation was performed. Accurate data on prevalence of IA in GP  
22 practices is lacking, and therefore an estimation was made based on previous literature. One  
23 study revealed that 27% assigned with the International Classification of Primary Care-1 code  
24 for suspected IA in their medical record had confirmed RA (n=38), polyarthritis (n=5), or  
25 oligoarthritis (n=8) following rheumatologist's assessment. Another study among GPs found  
26 that 18% of patients with suspected IA was referred; though data on rheumatologists'  
27 diagnoses was not provided.[25] Guided by these scarce data obtained in GP practices,  
28 performance of the model was simulated with an estimated prevalence of 20%.[5] The  
29 intercept of the regression model was adjusted as described in [26,27] and we plotted average  
30 estimated predicted probabilities against the regression and simplified risk score.  
31  
32  
33  
34  
35  
36  
37  
38  
39  
40  
41  
42  
43  
44  
45

46 Statistical analyses were performed using Statistical Package for the Social Sciences (SPSS,  
47 version 23.0). P-values <0.05 were considered significant.  
48  
49  
50  
51

## 52 **Patient involvement**

53  
54  
55  
56  
57  
58  
59  
60

1  
2  
3 Patient research partners agreed with the pathway of care at the EARC. They also provided  
4  
5 feedback on the questionnaire, which was expanded in 2012 with two questions.  
6  
7

## 8 9 **RESULTS**

### 10 11 12 13 **Patients**

14  
15 1,288 patients in whom GPs were unsure about the presence of IA visited the EARC between  
16  
17 2010 and 2015; of these, 41% had synovitis at joint examination. The frequency of  
18  
19 inflammatory arthritis was stable throughout the study years (S3 Appendix). Baseline  
20  
21 characteristics of patients in both derivation and validation dataset are presented in Table 1.  
22  
23  
24  
25

### 26 27 **Model derivation**

28  
29 In univariable analyses, male gender, age  $\geq 60$  years, symptom duration of  $< 6$  weeks, an acute  
30  
31 onset of symptoms, morning stiffness  $> 60$  minutes, a low number of painful joints (1–3  
32  
33 joints), presence of patient-reported joint swelling (1–3 joints), and difficulty with making a  
34  
35 fist were associated with the presence of IA in the derivation dataset (Table 2). ‘Symptoms  
36  
37 worst in the early morning’ was not associated with IA and therefore not included in  
38  
39 multivariable analysis. Two multivariable models were created with categorized variables;  
40  
41 first a model with categories similar to the univariable analysis (Table 3, model 1), and  
42  
43 secondly a model pooling categories per variable with similar regression coefficients (Table  
44  
45 3, model 2). Performing this second model in the derivation dataset revealed that male  
46  
47 gender, age  $\geq 60$  years, symptom duration of  $< 6$  weeks, a low number of painful joints (1–3  
48  
49 joints), and presence of patient-reported joint swelling were independently associated with  
50  
51 the presence of IA (Table 3). The AUC of model 2 was 0.75 (95%CI 0.70–0.79) in the  
52  
53  
54  
55  
56  
57  
58  
59  
60



1  
2  
3 derivation dataset. In sub-analysis, model 2 was repeated with a backward selection  
4  
5 procedure, showing similar regression coefficients (S4 Appendix).  
6  
7

### 9 **Generation of a simplified rule**

10  
11 In order to facilitate usage in routine clinical practice, a simplified model was generated (S5  
12  
13 Appendix). The obtained regression coefficient of acute onset of symptoms in multivariable  
14  
15 modelling was -0.015, yielding 0 points. Also after exclusion of this variable, the regression  
16  
17 coefficients of the other seven variables in the model did not change yielding similar points.  
18  
19 This resulted in a simplified rule consisting of seven scored items and a total score ranging  
20  
21 from 0 to 7.5 with corresponding predicted risks (Figure 1). Risks of IA predicted by the  
22  
23 model as a function of the regression score (i.e. the sum of the regression coefficients times  
24  
25 the value of the corresponding covariates) are presented in Figure 2A; as shown,  
26  
27 simplification did not majorly affect the predicted risks. The calibration plot shows that  
28  
29 predicted probabilities correlated well with the observed proportions of patients with IA (S6  
30  
31 Appendix). The Hosmer-Lemeshow test for the derivation dataset yielded a P-value of 0.36.  
32  
33 If cut-offs are required and a highly sensitive approach is preferred (>90% sensitivity), this is  
34  
35 obtained by a cut-off score of  $\geq 4$ . When a highly specific approach is preferred (>90%  
36  
37 specificity), this is obtained by a cut-off score of  $\geq 6$ . Test characteristics for all cut-off points  
38  
39 are presented in S7 Appendix. The AUC of the simplified score, measuring discrimination,  
40  
41 was 0.74 (95%CI 0.70–0.78; S8 Appendix).  
42  
43  
44  
45  
46  
47

### 48 **Validation**

49  
50 The final multivariable model (model 2) was applied in the validation dataset, revealing  
51  
52 similar results (Table 3). The AUC was 0.72 (95%CI 0.68–0.77). Figure 2A shows the  
53  
54 predicted probabilities of the simplified rule are almost similar to those obtained in the  
55  
56  
57  
58  
59  
60

1  
2  
3 derivation data. The AUC of the simplified rule was 0.71 (95%CI 0.67–0.75) in the validation  
4 dataset. The calibration plot is shown in S6 Appendix, the Hosmer-Lemeshow test for the  
5 validation dataset yielded a P-value of 0.43.  
6  
7  
8  
9

### 10 11 **Simulation of accuracy in a setting with a lower prevalence of IA**

12  
13 In contrast to test characteristics, predicted probabilities depend on the prior risk (i.e.  
14 prevalence) of IA. The frequency of IA among primary care patients with GP-determined  
15 clinical suspicion of IA may be different than that observed in the EARC. Based on  
16 observations in GP practices[5,25], a simulation was run for the regression and simplified  
17 score with a prevalence of inflammatory arthritis set at 20%. Estimated predicted  
18 probabilities for different scores of the multivariable model and simplified rule (in derivation  
19 and validation datasets) are presented in Figure 2B.  
20  
21  
22  
23  
24  
25  
26  
27  
28  
29  
30

31 Our simplified rule was implemented in a web application that provides predictions on the  
32 presence of current IA for individual patients; a screenshot is presented in Figure 3. The web  
33 application is accessible online at <http://caretool.eu/>  
34  
35  
36  
37  
38

### 39 **DISCUSSION**

40  
41  
42  
43 GPs play a crucial role in the early identification of RA and often lack confidence in  
44 detecting joint synovitis.[9] In an attempt to solve the contradiction between the need to refer  
45 very early and absence of evidence who must be referred, we provided an evidence-based and  
46 simple method to identify the presence of IA in patients in whom IA is suspected. This  
47 clinical rule helps to select patients to refer for additional investigations (laboratory or  
48  
49  
50  
51  
52  
53  
54  
55  
56  
57  
58  
59  
60

1  
2  
3 imaging) or to secondary care. Hence, the Clinical Arthritis Rule could increase  
4  
5 appropriateness of health care utilization.  
6  
7

8  
9 This study is different from studies that derived tools to facilitate triage of patients that have  
10  
11 been referred to secondary or tertiary care[15-17] as our study did not aim to prioritize  
12  
13 patients that are already referred. In addition, we aimed to facilitate recognition of IA (as this  
14  
15 would necessitate prompt referral to a rheumatologist) and did not perform a longitudinal  
16  
17 study to predict development of specific diagnoses (e.g. RA) later-on. This explains why  
18  
19 several factors were found to be associated with presence of IA that are not generally  
20  
21 considered typical for RA (male gender, a low number of painful joints, a short symptom  
22  
23 duration). GPs generally do well in identifying those at high risk for development of RA (i.e.  
24  
25 women with subacute smouldering polyarticular, symmetric complaints), and therefore we  
26  
27 aimed this tool to assist GPs in decision-making for more atypical or non-classical  
28  
29 presentations of IA (e.g. due to overlap of symptoms with other diagnoses) leading to doubt.  
30  
31 Indeed, many of the patients that did not have synovitis at the EARC had symptoms due to  
32  
33 diagnoses that are characterized by longstanding or extensive joint pain (e.g. osteoarthritis,  
34  
35 fibromyalgia), explaining higher scores for a short symptom duration or a low number of  
36  
37 symptomatic joints.  
38  
39  
40  
41  
42  
43

44 Adding other clinical variables might increase the discriminative ability of the model.

45  
46 Potential examples include the squeeze test of the metacarpophalangeal joints (although the  
47  
48 diagnostic accuracy was shown to be only moderate[28]), information on family history, or  
49  
50 functional impairments. These items were not routinely collected before December 2015.

51  
52 Adding data on laboratory investigations to our rule could potentially also increase its  
53  
54  
55  
56  
57  
58  
59  
60

1  
2  
3 discriminative ability. However, our data do not permit us to evaluate this, as additional  
4 investigations were done afterwards and only in patients with synovitis at joint examination.  
5  
6  
7

8  
9 A strength of our EARC for the purpose of this study is that GPs in our region are familiar  
10 with the need for early referral and that regional healthcare logistics make rheumatology care  
11 rapidly available for patients with arthritis, with the EARC as ultimate service for patients in  
12 whom GPs suspect (but are unsure about) IA. With the availability of the EARC every week  
13 and lack of any waiting list for the EARC, we assume a low number of patients not showing  
14 up at the EARC despite being encouraged by their GP to visit the EARC. As the EARC serves  
15 as a unique bridge between primary and secondary care, its patients closely resemble the  
16 population GPs have contact with and have doubts about. Although the EARC is successful  
17 in our region[11,23], this approach may be more difficult to implement in other centres or  
18 regions due to a shortage of rheumatologists, or long traveling distances to rheumatology  
19 outpatient clinics, and as such a different system is needed to aid GPs in identifying IA. This  
20 prompted us to derive a validated rule composed of clinical characteristics that could assist  
21 GPs in decision-making for more atypical or non-classical (but nevertheless suspect)  
22 presentations of IA, as classical presentations usually don't cause GPs concern.  
23  
24  
25  
26  
27  
28  
29  
30  
31  
32  
33  
34  
35  
36  
37  
38  
39  
40

41 GPs were discouraged (both by our local communication with GPs and according to national  
42 guidelines for GPs) to perform autoantibody testing.[29] Autoantibody testing in primary care  
43 in this region was infrequent[5], unlike in other parts of the world. Autoantibody testing may  
44 falsely reassure doctors and patients, especially when results are negative, and as such we  
45 believe a model based on clinical presentation is more appropriate to facilitate rapid referral.  
46  
47  
48  
49  
50  
51  
52 Another strength is that we studied patients in whom the GPs have indicated a lack of  
53 confidence to identify the presence of synovitis. Patients with clinically obvious IA had early  
54  
55  
56  
57  
58  
59  
60

1  
2  
3 access to rheumatologic care already. This may enhance the generalizability of the present  
4 data to the setting of doubt in primary care. Furthermore, the use of real-life observational  
5 data in our study may boost external validity of the results.  
6  
7  
8  
9

10  
11 A disadvantage of our setting is that the data were not collected in primary care itself, but in a  
12 setting intermediary between primary and secondary care. Although musculoskeletal  
13 symptoms are a very common reason for consulting primary care, suspected IA is relatively  
14 unusual, and the average full-time GP diagnoses only one new patient with RA each year.[30]  
15  
16 Additionally, although the EARC is easily accessible on a weekly basis, the exact number of  
17 patients that were referred but did not visit the EARC is unknown. Validation in primary care  
18 is required. We studied ‘the difficult group’ of patients in whom GPs were uncertain of the  
19 presence of suspected IA. The prevalence of such patients in primary care may be higher and  
20 as a consequence the actual prevalence of IA among suspected IA patients may be lower than  
21 41% in primary care. Since the post-test probabilities strongly depend on the prevalence (i.e.  
22 pre-test probability), a simulation was performed with an estimated prevalence of IA that was  
23 half of the prevalence as observed in our data (20%). The choice of 20% was based on  
24 literature from primary care; although not much is known about suspected IA in primary care,  
25 two study suggested a prevalence of IA among suspected patients of 18-27%[5, 25]. We  
26 demonstrated the predictive accuracy of the model using a simulated prevalence of 20%.  
27  
28 Because of the limitation that no other data are available on the prevalence of IA when GPs  
29 suspect IA, this estimated prevalence could be an overestimation. However, the observed data  
30 could also be an underestimation as in our setting GPs were instructed to refer patients with  
31 high suspicion/definite arthritis to the regular outpatient clinic. Further external validation in  
32 GP settings is therefore required.  
33  
34  
35  
36  
37  
38  
39  
40  
41  
42  
43  
44  
45  
46  
47  
48  
49  
50  
51  
52  
53  
54  
55  
56  
57  
58  
59  
60

1  
2  
3 GPs in our region are well informed about the importance of the early detection of IA, but the  
4  
5 GPs in our region feel that their actual detection skills are not different from that of GPs  
6  
7 elsewhere. However if the detection skills of our GPs are different from that of GPs in other  
8  
9 regions, a lower prevalence of IA (and therefore lower pre-test probabilities) may be present.  
10  
11 As a consequence, the rule may yield lower post-test probabilities. This effect may have been  
12  
13 dealt with in the simulation analysis but still external validation in primary care and  
14  
15 preferably in different regions or countries is necessary.  
16  
17

18  
19  
20 We expect that our rule (Clinical Arthritis RuleE - CARE) might support GPs and other health  
21  
22 care professionals in the decision-making process in patients with musculoskeletal symptoms  
23  
24 in whom they suspect IA, regardless of the region. Of course, the consequences of an  
25  
26 increased score will likely depend on the setting and relation with secondary care: it can  
27  
28 either influence the decision to directly refer a patient or to first ask for additional laboratory  
29  
30 tests (e.g. acute phase reactants or autoantibodies; Figure 4). A clinical decision aid may be of  
31  
32 value to this end as well, as for most laboratory investigations the diagnostic accuracy  
33  
34 depends on the prior risk. Using a simple clinical decision aid first may be more cost-  
35  
36 effective than performing additional investigations in all patients in whom there is doubt  
37  
38 about IA. Depending on the setting and consequences of a high score, either a sensitive  
39  
40 method or a specific method may be preferred; for this reason cut-offs for both situations are  
41  
42 provided. The web application, also easily assessable by phone, facilitates implementation of  
43  
44 the Clinical Arthritis RuleE by GPs, physicians, and other health care professionals such as  
45  
46 physiotherapists in their daily work.  
47  
48  
49  
50

## 51 52 **CONCLUSION** 53 54 55 56 57 58 59 60

1  
2  
3 In conclusion, this study developed a clinical rule that supports the identification of patients  
4 suspected of having IA by physicians that feel insufficiently experienced in assessment of  
5 synovitis by joint examination. We hope the current data are a prelude to a data-driven  
6  
7 method that supports GPs, physicians, and other health care professionals in decision-making  
8  
9 in patients with suspected early IA.  
10  
11  
12  
13  
14  
15  
16  
17  
18  
19  
20  
21  
22  
23  
24  
25  
26  
27  
28  
29  
30  
31  
32  
33  
34  
35  
36  
37  
38  
39  
40  
41  
42  
43  
44  
45  
46  
47  
48  
49  
50  
51  
52  
53  
54  
55  
56  
57  
58  
59  
60

For peer review only

1  
2  
3 **LIST OF ABBREVIATIONS**  
4  
5  
6

7 AUC = Area Under the Curve

8  
9 CARE = Clinical Arthritis Rule

10  
11 EAC = Early Arthritis Clinic

12  
13 EARC = Early Arthritis Recognition Clinic

14  
15 GPs = General Practitioners

16  
17 IA = Inflammatory Arthritis

18  
19 LUMC = Leiden University Medical Centre

20  
21 MCP = Metacarpophalangeal

22  
23 NICE = National Institute for Health and Care Excellence

24  
25 RA = Rheumatoid Arthritis

26  
27 UK = United Kingdom  
28  
29  
30  
31  
32  
33  
34  
35  
36  
37  
38  
39  
40  
41  
42  
43  
44  
45  
46  
47  
48  
49  
50  
51  
52  
53  
54  
55  
56  
57  
58  
59  
60



## DECLARATIONS

### Ethics approval and consent to participate

The medical ethical committee of the Leiden University Medical Centre ("Commissie Medische Ethiek") approved the study.

### Consent for publication

Not applicable.

### Availability of data and material

The calculator presented in this paper is available online at <http://caretool.eu>. Statistical code and dataset are available from R.M. ten Brinck (e-mail; [r.m.ten\\_brinck@lumc.nl](mailto:r.m.ten_brinck@lumc.nl)) at reasonable request.

### Competing interests

The authors declare that they have no competing interests. All authors have completed the ICMJE uniform disclosure form at [www.icmje.org/coi\\_disclosure.pdf](http://www.icmje.org/coi_disclosure.pdf) and declare: no support from any organization for the submitted work; no financial relationships with any organizations that might have an interest in the submitted work; no other relationships or activities that could appear to have influenced the submitted work. The disclosure forms are available at request.

### Patient consent

Obtained.

### Funding

1  
2  
3 This work was supported by the Dutch Arthritis Foundation and a Vidi grant by the  
4  
5 Netherlands Organization of Health Research and Development (RtB, AvdHvM). CDM is  
6  
7 funded by the NIHR Collaborations for Leadership in Applied Health Research and Care  
8  
9 (CLAHRC) West Midlands, the NIHR SPCR, and a NIHR Research Professorship in General  
10  
11 Practice (NIHR-RP-2014-04-026). The funders did not have any role in the study design; the  
12  
13 collection, analysis, and interpretation of data; the writing of the report; nor the decision to  
14  
15 submit the paper for publication. The views and opinions expressed herein are those of the  
16  
17 authors and do not necessarily reflect those of the NIHR (UK).  
18  
19  
20  
21

### 22 **Authors' contributions**

23  
24 RtB, BvD, and AvdHvM designed the study. RtB, BvD, and SIC conducted the statistical  
25  
26 analysis. RtB, BvD and AvdHvM conducted the literature search and wrote the article. RtB,  
27  
28 BvD, HvS, SIC, MN, SH, CM and AvdHvM contributed intellectually to the writing or  
29  
30 revising of the manuscript, and approved the final version.

### 31 **Acknowledgements**

32 We thank the involved patients research partners for their feedback on the questionnaire. The  
33  
34 views and opinions expressed herein are those of the authors and do not necessarily reflect  
35  
36 those of the NIHR (UK).  
37  
38  
39  
40  
41  
42  
43  
44  
45  
46  
47  
48  
49  
50  
51  
52  
53  
54  
55  
56  
57  
58  
59  
60

## REFERENCES

1. Van Nies JA, Krabben A, Schoones JW, Huizinga TW, Kloppenburg M, Van der Helm-van Mil AHM. What is the evidence for the presence of a therapeutic window of opportunity in rheumatoid arthritis? A systematic literature review. *Ann Rheum Dis*. 2014 May;73(5):861-70. doi: 10.1136/annrheumdis-2012-203130.
2. Combe B, Landewé R, Daien CI, *et al*. 2016 update of the EULAR recommendations for the management of early arthritis. *Ann Rheum Dis*. 2017 Jun;76(6):948-959. doi: 10.1136/annrheumdis-2016-210602.
3. NICE quality standard: Rheumatoid arthritis in over 16s [QS33] - Quality statement 1: Referral. [Internet] Available from: <https://www.nice.org.uk/guidance/qs33/chapter/Quality-statement-1-Referral>. [accessed on 10 May 2017].
4. Ledingham JM, British Society for Rheumatology National Audit Project. Importance of early detection and referral of rheumatoid arthritis. *BMJ*. 2016 Apr 18;353:i2172. doi: 10.1136/bmj.i2172.
5. Newsum EC, de Waal MWM, van Steenberg HW, Gussekloo J, Van der Helm-van Mil AHM. How do general practitioners identify inflammatory arthritis?—A cohort analysis of Dutch general practitioner electronic medical records. *Rheumatology (Oxford)*. 2016 May;55(5):848-53. doi: 10.1093/rheumatology/kev432
6. Emery P, Breedveld FC, Dougados M, Kalden JR, Schiff MH, Smolen JS. Early referral recommendation for newly diagnosed rheumatoid arthritis: evidence based development of a clinical guide. *Ann Rheum Dis*. 2002 Apr;61(4):290-7.
7. Mankia K, Nam J, Emery P. Identifying arthralgia suspicious for progression to rheumatoid arthritis. *Ann Rheum Dis*. 2017 Jun;76(6):e14. doi: 10.1136/annrheumdis-2016-210853.
8. National Audit Office. Services for people with rheumatoid arthritis. [Internet] Available from: <http://www.nao.org.uk/report/services-for-people-with-rheumatoid-arthritis/>. [accessed on 10 May 2017]
9. Meyfroidt S, Stevens J, De Lepeleire J, *et al*. A general practice perspective on early rheumatoid arthritis management: A qualitative study from Flanders. *Eur J Gen Pract*. 2015;21(4):231-7. doi: 10.3109/13814788.2015.1084279.
10. Raza K, Stack R, Kumar K, *et al*. Delays in assessment of patients with rheumatoid arthritis: variations across Europe. *Ann Rheum Dis*. 2011 Oct;70(10):1822-5. doi: 10.1136/ard.2011.151902.

- 1  
2  
3 11. Van der Linden MP, Le Cessie S, Raza K, *et al.* Long-term impact of delay in assessment  
4 of patients with early arthritis. *Arthritis Rheum.* 2010 Dec;62(12):3537-46. doi:  
5 10.1002/art.27692.  
6
- 7 12. Nielen MM, Spronk I, Davids R. [Incidentie en prevalentie van gezondheidsproblemen in  
8 de Nederlandse huisartsenpraktijk in 2014]. From: NIVEL Zorgregistratie Eerste Lijn  
9 [Internet]. 2017; Available from: <https://www.nivel.nl/nl/NZR/incidenties-en-prevalenties>  
10 [accessed on 10 May 2017]  
11  
12
- 13 13. Jordan KP, Kadam UT, Hayward R, Porcheret M, Young C, Croft P. Annual consultation  
14 prevalence of regional musculoskeletal problems in primary care: an observational study.  
15 *BMC Musculoskelet Disord.* 2010 Jul 2;11:144. doi: 10.1186/1471-2474-11-144.  
16
- 17 14. Jordan KP, Jöud A, Bergknut C, *et al.* International comparisons of the consultation  
18 prevalence of musculoskeletal conditions using population-based healthcare data from  
19 England and Sweden. *Ann Rheum Dis.* 2014 Jan;73(1):212-8. doi: 10.1136/annrheumdis-  
20 2012-202634.  
21  
22
- 23 15. Bell MJ, Tavares R, Guillemin F, Bykerk VP, Tugwell P, Wells GA. Development of a  
24 self-administered early inflammatory arthritis detection tool. *BMC Musculoskelet Disord.*  
25 2010 Mar 17;11:50. doi: 10.1186/1471-2474-11-50.  
26  
27
- 28 16. Tavares R, Huang S, Bykerk VP, Bell MJ. A parallel group cohort to determine the  
29 measurement properties of an early inflammatory arthritis detection tool. *Rheumatology*  
30 *(Oxford).* 2013 Nov;52(11):2077-85. doi: 10.1093/rheumatology/ket190.  
31  
32
- 33 17. Villeneuve E, Nam JL, Bell MJ, *et al.* A systematic literature review of strategies  
34 promoting early referral and reducing delays in the diagnosis and management of  
35 inflammatory arthritis. *Ann Rheum Dis.* 2013 Jan;72(1):13-22. doi: 10.1136/annrheumdis-  
36 2011-201063.  
37
- 38 18. Croydon Health Services NHS Foundation Trust. Early Inflammatory Arthritis Clinic  
39 Referral Form. [Internet] Available from:  
40 [https://www.croydonhealthservices.nhs.uk/Downloads/GP\\_resources/Referral%20and%20ser-](https://www.croydonhealthservices.nhs.uk/Downloads/GP_resources/Referral%20and%20service%20information/Arthritis/Primary%20Care%20Referral%20form%20for%20Early%20Inflammatory%20Arthritis%20Clinic.pdf)  
41 [vice%20information/Arthritis/Primary%20Care%20Referral%20form%20for%20Early%20I-](https://www.croydonhealthservices.nhs.uk/Downloads/GP_resources/Referral%20and%20service%20information/Arthritis/Primary%20Care%20Referral%20form%20for%20Early%20Inflammatory%20Arthritis%20Clinic.pdf)  
42 [nflammatory%20Arthritis%20Clinic.pdf](https://www.croydonhealthservices.nhs.uk/Downloads/GP_resources/Referral%20and%20service%20information/Arthritis/Primary%20Care%20Referral%20form%20for%20Early%20Inflammatory%20Arthritis%20Clinic.pdf). [accessed on 10 May 2017].  
43  
44
- 45 19. Hampshire Hospitals NHS Foundation Trust. New Early Arthritis Referral form.  
46 [Internet] Available from:  
47 [https://www.hampshirehospitals.nhs.uk/media/419347/early\\_arthritis\\_referral\\_additional\\_infor-](https://www.hampshirehospitals.nhs.uk/media/419347/early_arthritis_referral_additional_information.pdf)  
48 [mation.pdf](https://www.hampshirehospitals.nhs.uk/media/419347/early_arthritis_referral_additional_information.pdf). [accessed on 10 May 2017].  
49  
50
- 51 20. Musgrove Park Hospital. Early Arthritis Referral Form. [Internet] Available from:  
52 <http://www.tsft.nhs.uk/media/353049/early-arthritis-final.pdf>. [accessed on 10 May 2017].  
53  
54  
55  
56  
57  
58  
59

- 1  
2  
3 21. Hülsemann JL, Mattussek S, Siegmund-Schultze E, Zeidler H. [Early diagnosis of  
4 arthritis and spondyloarthritis within the framework of integrated health care in Lower  
5 Saxony]. *Z Rheumatol*. 2006 Feb;65(1):70-4.  
6  
7 22. Guy's and St Thomas' NHS Foundation Trust. Early arthritis Clinic Referral Criteria.  
8 [Internet] Available from: [http://www.guysandstthomas.nhs.uk/our-](http://www.guysandstthomas.nhs.uk/our-services/rheumatology/specialties/early-arthritis/referrals.aspx#na)  
9 [services/rheumatology/specialties/early-arthritis/referrals.aspx#na](http://www.guysandstthomas.nhs.uk/our-services/rheumatology/specialties/early-arthritis/referrals.aspx#na). [accessed on 10 May  
10 2017].  
11  
12 23. Van Nies JA, Brouwer E, Van Gaalen FA, *et al*. Improved early identification of arthritis:  
13 evaluating the efficacy of Early Arthritis Recognition Clinics. *Ann Rheum Dis*. 2013  
14 Aug;72(8):1295-301. doi: 10.1136/annrheumdis-2012-202289.  
15  
16 24. White IR, Royston P, Wood AM. Multiple imputation using chained equations: Issues  
17 and guidance for practice. *Stat Med*. 2011 Feb 20;30(4):377-99. doi: 10.1002/sim.4067.  
18  
19 25. Knuiman CA, Schers HJ. [Het beloop van aspecifieke artritis]. *Huisarts Wet*.  
20 2011;54(5):234-236.  
21  
22 26. King G, Zeng L. Estimating risk and rate levels, ratios and differences in case-control  
23 studies. *Statistics in Medicine*. 2002;21(10):1409  
24  
25 27. King G, Zeng L. Inference in Case-Control Studies. *Encyclopedia of Biopharmaceutical*  
26 *Statistics*. 2004. Available at: <https://gking.harvard.edu/files/gking/files/1s-enc.pdf>.  
27  
28 28. Van den Bosch WB, Mangnus L, Reijnierse M, Huizinga TW, van der Helm-van Mil  
29 AHM. The diagnostic accuracy of the squeeze test to identify arthritis: a cross-sectional  
30 cohort study. *Ann Rheum Dis*. 2015 Oct;74(10):1886-9. doi: 10.1136/annrheumdis-2014-  
31 207202.  
32  
33 29. Janssens HJEM, Lagro HAHM, Van Peet PG, *et al*. [NHG-Standaard Artritis (Eerste  
34 versie)]. *Huisarts Wet* 2009;52(9):439-53.  
35  
36 30. Symmons D, Turner G, Webb R, *et al*. The prevalence of rheumatoid arthritis in the  
37 United Kingdom: new estimates for a new century. *Rheumatology (Oxford)*. 2002  
38 Jul;41(7):793-800.  
39  
40  
41  
42  
43  
44  
45  
46  
47  
48  
49  
50  
51  
52  
53  
54  
55  
56  
57  
58  
59  
60

**Table 1. Characteristics of patients visiting the Early Arthritis *Recognition* Clinic**

|                                                                             | Derivation<br>(N=644) | Validation<br>(N=644) | P-value** |
|-----------------------------------------------------------------------------|-----------------------|-----------------------|-----------|
| Male, n (%)                                                                 | 190 (30)              | 198 (31)              | 0.62      |
| Age in years, mean $\pm$ SD                                                 | 52 $\pm$ 16           | 51 $\pm$ 17           | 0.27      |
| Symptom duration in weeks, median (IQR)                                     | 10 (3–45)             | 12 (4–45)             | 0.18      |
| Acute onset of symptoms *, n (%)                                            | 252 (39)              | 238 (37)              | 0.45      |
| Symptoms worst in the early morning, n (%)                                  | 372 (58)              | 351 (55)              | 0.10      |
| Morning stiffness in minutes, median (IQR)                                  | 10 (0–30)             | 10 (0–30)             | 0.33      |
| Number of painful joints, median (IQR)                                      | 7 (2–15)              | 6 (3–15)              | 0.69      |
| Number patient-reported swollen joints, median (IQR)                        | 2 (1–5)               | 2 (1–5)               | 0.19      |
| Difficulty with making a fist, n (%)                                        | 329 (51)              | 301 (47)              | 0.06      |
| Arthritis present at joint examination by experienced rheumatologist, n (%) | 271 (42)              | 252 (39)              | 0.28      |

**Legend:**

\* Patients were asked to define onset of symptoms; either acute onset of symptoms or gradual onset of symptoms, see S1 Appendix. Abbreviations: IQR = interquartile range; SD = standard deviation. \*\* Unpaired t-tests, chi-squared tests and Mann-Whitney U tests were used as appropriate.

1 **Table 2. Univariable logistic regression in the derivation dataset with presence of**  
 2 **synovitis upon joint examination as outcome.**

|                                                         | Arthritis<br>(N=271) | No arthritis<br>(N=373) | OR (95% CI)      |
|---------------------------------------------------------|----------------------|-------------------------|------------------|
| <b>Male, n (%)</b>                                      | 104 (38)             | 86 (23)                 | 2.1 (1.5–2.9)    |
| <b>Age, n (%)</b>                                       |                      |                         |                  |
| <40                                                     | 49 (18)              | 104 (28)                | (ref)            |
| 40–59.9                                                 | 109 (40)             | 172 (46)                | 1.3 (0.89–2.0)   |
| ≥60                                                     | 113 (42)             | 97 (26)                 | 2.5 (1.6–3.8)    |
| <b>Symptom duration in weeks, n (%)</b>                 |                      |                         |                  |
| <6                                                      | 124 (46)             | 103 (28)                | 3.8 (2.4–5.9)    |
| 6–11                                                    | 38 (14)              | 62 (17)                 | 1.9 (1.1–3.9)    |
| 12–51.9                                                 | 66 (24)              | 75 (20)                 | 2.7 (1.7–4.5)    |
| ≥52                                                     | 43 (16)              | 132 (36)                | (ref)            |
| <b>Acute onset of symptoms *, n (%)</b>                 | 122 (45)             | 131 (35)                | 1.5 (1.1–2.1)    |
| <b>Symptoms worst in early morning, n (%)</b>           | 158 (58)             | 214 (57)                | 1.1 (0.69–1.6)   |
| <b>Morning stiffness &gt;60 min, n (%)</b>              | 45 (17)              | 40 (11)                 | 1.7 (1.03–2.7)   |
| <b>Number of painful joints, n (%)</b>                  |                      |                         |                  |
| 0                                                       | 1 (0)                | 10 (3)                  | (ref)            |
| 1–3                                                     | 110 (41)             | 82 (22)                 | 13.2 (1.7–105.5) |
| 4–10                                                    | 76 (28)              | 123 (33)                | 6.1 (0.77–49.0)  |
| ≥11                                                     | 84 (31)              | 158 (42)                | 5.2 (0.65–41.3)  |
| <b>Number of patient-reported swollen joints, n (%)</b> |                      |                         |                  |
| 0                                                       | 18 (7)               | 71 (19)                 | (ref)            |
| 1–3                                                     | 115 (42)             | 119 (32)                | 3.7 (2.0–6.9)    |
| 4–10                                                    | 87 (32)              | 115 (31)                | 2.9 (1.5–5.5)    |
| ≥11                                                     | 51 (19)              | 68 (18)                 | 2.9 (1.4–5.9)    |
| <b>Difficulty with making a fist, n (%)</b>             | 156 (58)             | 172 (46)                | 1.6 (1.1–2.4)    |

3

4 **Legend:**

5 \* Patients were asked to define onset of symptoms; either acute onset of symptoms or gradual  
 6 onset of symptoms, see S1 Appendix. Abbreviations: CI = confidence interval; OR = odds  
 7 ratio.

8

9 **Table 3. Multivariable logistic regression analyses with synovitis upon joint examination**  
 10 **as outcome. Model 1 includes categories of clinically applicable cut-offs; if within**  
 11 **variables several categories had similar regression coefficients, categories were pooled**  
 12 **(Model 2).**

|                                                  | Model 1             |                 | Model 2             |                 |                     |
|--------------------------------------------------|---------------------|-----------------|---------------------|-----------------|---------------------|
|                                                  | Derivation          |                 | Derivation          |                 | Validation          |
|                                                  | OR (95% CI)         |                 | OR (95% CI)         | B               | OR (95% CI)         |
| <b>Male</b>                                      | 1.7 (1.1–2.5)       |                 | 1.7 (1.1–2.5)       | 0.517           | 1.7 (1.1–2.4)       |
| <b>Age (years)</b>                               | <40                 | (ref)           | 0–59.9              | (ref)           | (ref)               |
|                                                  | 40–59.9             | 1.5 (0.96–2.5)  | ≥60                 | 2.1 (1.4–3.1)   | 0.750               |
|                                                  | ≥60                 | 2.9 (1.7–4.8)   |                     |                 | 2.1 (1.5–3.0)       |
| <b>Symptom duration (weeks)</b>                  | <6                  | 3.8 (2.3–6.4)   | <6                  | 3.6 (2.2–6.0)   | 1.279               |
|                                                  | 6–11                | 1.7 (0.92–3.1)  | 6–51.9              | 2.2 (1.4–3.6)   | 0.797               |
|                                                  | 12–51.9             | 2.9 (1.7–5.0)   | ≥52                 | (ref)           | (ref)               |
|                                                  | ≥52                 | (ref)           |                     |                 | (ref)               |
| <b>Acute onset of symptoms*</b>                  | 1.0 (0.67–1.5)      |                 | 0.99 (0.66–1.5)     | -0.015          | 1.0 (0.70–1.5)      |
| <b>Morning stiffness (minutes)</b>               | >60                 | 1.6 (0.88–2.9)  | >60                 | 1.6 (0.91–2.9)  | 0.485               |
| <b>Number of painful joints</b>                  | 0                   | (ref)           | 0                   | (ref)           | (ref)               |
|                                                  | 1–3                 | 9.3 (1.1–78.2)  | 1–3                 | 10.0 (1.2–83.4) | 2.300               |
|                                                  | 4–10                | 4.5 (0.53–37.6) | ≥4                  | 4.5 (0.54–37.1) | 1.497               |
|                                                  | ≥11                 | 3.3 (0.39–28.4) |                     |                 | 5.2 (0.61–45.1)     |
| <b>Number of patient-reported swollen joints</b> | 0                   | (ref)           | 0                   | (ref)           | (ref)               |
|                                                  | 1–3                 | 3.2 (1.6–6.4)   | ≥1                  | 3.5 (1.9–6.6)   | 1.253               |
|                                                  | 4–10                | 3.4 (1.7–7.0)   |                     |                 | 3.7 (1.9–7.0)       |
|                                                  | ≥11                 | 4.3 (1.9–10.0)  |                     |                 |                     |
| <b>Difficulty with making a fist</b>             | 1.6 (0.97–2.5)      |                 | 1.6 (0.99–2.6)      | 0.467           | 1.4 (0.91–2.2)      |
| <b>Intercept</b>                                 | -4.8                |                 |                     | -4.6            | -4.6                |
| <b>AUC</b>                                       | 0.76<br>(0.71–0.80) |                 | 0.75<br>(0.70–7.79) |                 | 0.72<br>(0.68–0.77) |

13

14 **Legend:**



1  
2  
3 15 \* Patients were asked to define onset of symptoms; either acute onset of symptoms or gradual  
4  
5 16 onset of symptoms, see S1 Appendix. Variables with p-values <0.05 in univariable analysis  
6  
7 17 in the derivation set were entered in multivariable regression analyses. Abbreviations: B =  
8  
9 18 beta; CI = confidence interval; OR = odds ratio.  
10  
11 19  
12  
13  
14  
15  
16  
17  
18  
19  
20  
21  
22  
23  
24  
25  
26  
27  
28  
29  
30  
31  
32  
33  
34  
35  
36  
37  
38  
39  
40  
41  
42  
43  
44  
45  
46  
47  
48  
49  
50  
51  
52  
53  
54  
55  
56  
57  
58  
59  
60

For peer review only

1  
2  
3  
4  
5 20 **Figure 1. The Clinical Arthritis Rule (CARE) and corresponding predicted risks of the presence of inflammatory arthritis per score.**

6  
7 21

8  
9 22 **Legend:**

10  
11 23 Observed risks of current inflammatory arthritis were obtained by calculating the proportion of patients with a positive outcome (rheumatologist-  
12  
13 24 confirmed synovitis) for each value of the risk score in the derivation dataset.  
14

15  
16 25  
17  
18  
19  
20  
21  
22  
23  
24  
25  
26  
27  
28  
29  
30  
31  
32  
33  
34  
35  
36  
37  
38  
39  
40  
41  
42  
43  
44  
45  
46  
47

1  
2  
3  
4  
5 26 **Figure 2. The Clinical Arthritis Rule (CARE) and presentation of the predicted probabilities of the presence of current inflammatory**  
6  
7 27 **arthritis based on the regression model, and the simplified score as observed in the derivation and validation datasets (A), and estimated**  
8  
9 28 **predicted probabilities in a simulation with a pre-test probability (i.e. prevalence) of inflammatory arthritis of 20% (B).**  
10  
11  
12  
13

14 30 **Legend:**

15  
16 31 Predicted probabilities of the final multivariable logistic regression model, fitted in the derivation set as function of the regression score (i.e. the  
17  
18 32 sum of the regression coefficients times the value of the corresponding covariates (green line)). Furthermore, for each value of the simplified  
19  
20  
21 33 score the mean predicted probability is plotted in the derivation and validation dataset (blue and orange dots).  
22  
23  
24  
25  
26  
27  
28  
29  
30  
31  
32  
33  
34  
35  
36  
37  
38  
39  
40  
41  
42  
43  
44  
45  
46  
47

1  
2  
3 34 **FIGURE 3. A stylized representation of the Clinical Arthritis Rule, to be used in**  
4  
5 35 **patients in whom GPs doubt about the presence of inflammatory arthritis.**  
6

7 36

8  
9 37 **Legend:**

10  
11 38 The web application that provides predictions on the predicted risk of inflammatory arthritis  
12  
13 39 for individual patients as can be accessed at <http://caretool.eu/>  
14

15  
16 40

17  
18  
19  
20  
21  
22  
23  
24  
25  
26  
27  
28  
29  
30  
31  
32  
33  
34  
35  
36  
37  
38  
39  
40  
41  
42  
43  
44  
45  
46  
47  
48  
49  
50  
51  
52  
53  
54  
55  
56  
57  
58  
59  
60

For peer review only

1  
2  
3 41 **FIGURE 4. Flowchart of decision-making in patients with suspected early IA based on**  
4  
5 42 **clinical characteristics and the role of the Clinical Arthritis Rule**

6  
7 43

8  
9 44  
10  
11  
12  
13  
14  
15  
16  
17  
18  
19  
20  
21  
22  
23  
24  
25  
26  
27  
28  
29  
30  
31  
32  
33  
34  
35  
36  
37  
38  
39  
40  
41  
42  
43  
44  
45  
46  
47  
48  
49  
50  
51  
52  
53  
54  
55  
56  
57  
58  
59  
60

For peer review only

1  
2  
3 45 **OVERVIEW OF SUPPORTING INFORMATION**  
4  
5 46

6  
7 47 **S1 Appendix. The questionnaire (in Dutch) completed by patients at the Early Arthritis**  
8  
9 48 ***Recognition Clinic (EARC).***  
10

11 49  
12  
13 50 **S2 Appendix. Frequencies of missing variables.**  
14  
15 51

16 52 **S3 Appendix. Frequency of synovitis at joint examination per number of visits per year.**  
17  
18 53

19 54 **S4 Appendix. Simplified model based on the derivation dataset, with arthritis upon**  
20  
21 55 **examination as dependent variable using backward stepwise logistic regression.**  
22  
23 56

24 57 **S5 Appendix. Simplified model based on the derivation dataset, with synovitis upon**  
25  
26 58 **joint examination as dependent variable.**  
27  
28 59

29 60 **S6 Appendix. Calibration plot showing the observed probabilities on current**  
30  
31 61 **inflammatory arthritis in the derivation (A) and validation dataset (B) versus the**  
32  
33 62 **predicted probabilities according to the model.**  
34  
35 63

36 64 **S7 Appendix. Test characteristics of the simplified model in both the derivation and**  
37  
38 65 **validation dataset with presence of synovitis upon joint examination as outcome.**  
39  
40 66

41 67 **S8 Appendix. Receiver operator characteristics curves for the logistic regression models**  
42  
43 68 **with presence of synovitis upon joint examination as outcome, showing sensitivity and**  
44  
45  
46  
47  
48  
49  
50  
51  
52  
53  
54  
55  
56  
57  
58  
59  
60

1  
2  
3 69 **specificity of both regression score and simplified tool score in the derivation and**  
4  
5 70 **validation dataset.**  
6  
7  
8  
9  
10  
11  
12  
13  
14  
15  
16  
17  
18  
19  
20  
21  
22  
23  
24  
25  
26  
27  
28  
29  
30  
31  
32  
33  
34  
35  
36  
37  
38  
39  
40  
41  
42  
43  
44  
45  
46  
47  
48  
49  
50  
51  
52  
53  
54  
55  
56  
57  
58  
59  
60

For peer review only

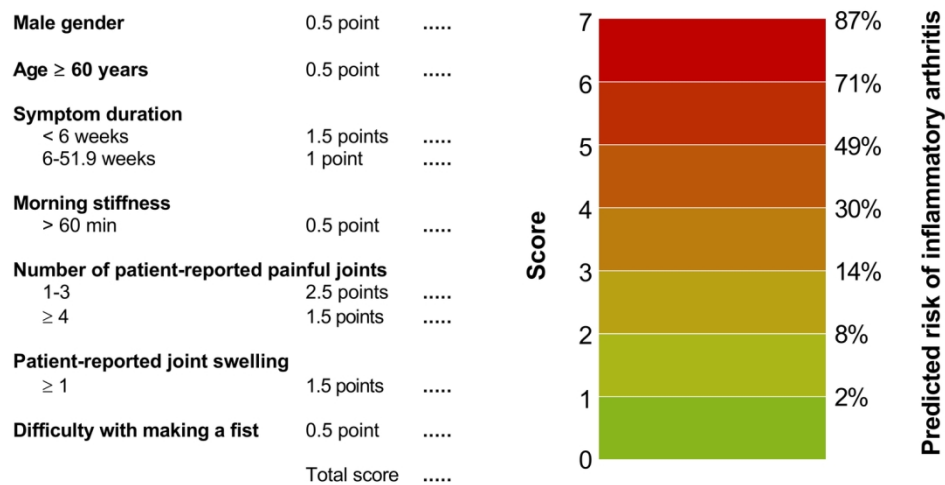

Figure 1. The Clinical Arthritis Rule (CARE) and corresponding predicted risks of the presence of inflammatory arthritis per score.

Legend:

Observed risks of current inflammatory arthritis were obtained by calculating the proportion of patients with a positive outcome (rheumatologist-confirmed synovitis) for each value of the risk score in the derivation dataset.

143x78mm (300 x 300 DPI)



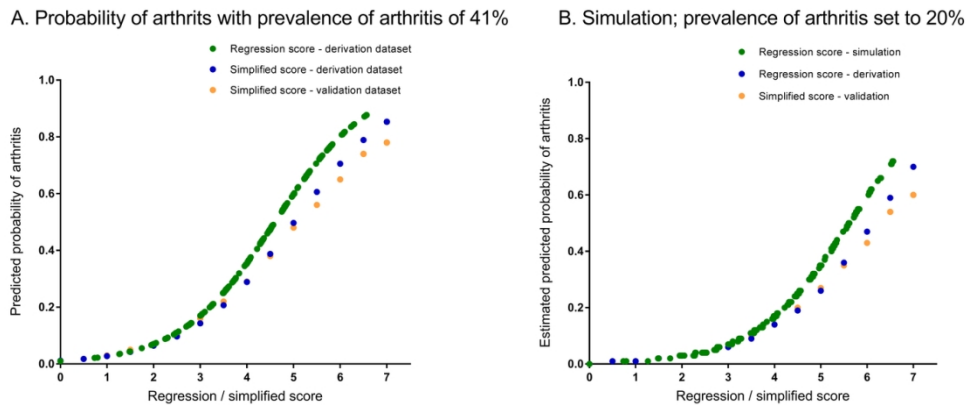

Figure 2. The Clinical Arthritis Rule (CARE) and presentation of the predicted probabilities of the presence of current inflammatory arthritis based on the regression model, and the simplified score as observed in the derivation and validation datasets (A), and estimated predicted probabilities in a simulation with a pre-test probability (i.e. prevalence) of inflammatory arthritis of 20% (B).

Legend:

Predicted probabilities of the final multivariable logistic regression model, fitted in the derivation set as function of the regression score (i.e. the sum of the regression coefficients times the value of the corresponding covariates (green line)). Furthermore, for each value of the simplified score the mean predicted probability is plotted in the derivation and validation dataset (blue and orange dots).

122x53mm (300 x 300 DPI)

## The Clinical Arthritis Rule (CARE)

Welcome to the Clinical Arthritis Rule (CARE) calculator!

This calculator estimates the risks of the presence of inflammatory arthritis based on the research of Ten Brinck *et al.* More information on this calculator can be found at the bottom of the page. The rule is developed for use in patients in whom GPs or other physicians doubt about the presence of inflammatory arthritis. The calculator estimates the risk of the presence of synovitis, detectable at joint examination by experienced rheumatologists.

Gender:

- Male  
 Female

Age

Symptom duration:

- < 6 weeks  
 6-51 weeks  
 ≥ 52 weeks

Morning stiffness duration:

- ≤ 60 minutes  
 > 60 minutes

Number of patient-reported painful joints:

- 1-3 joints  
 ≥ 4 joints

Patient-reported joint swelling:

- Yes  
 No

Difficulty with making a fist:

- Yes  
 No

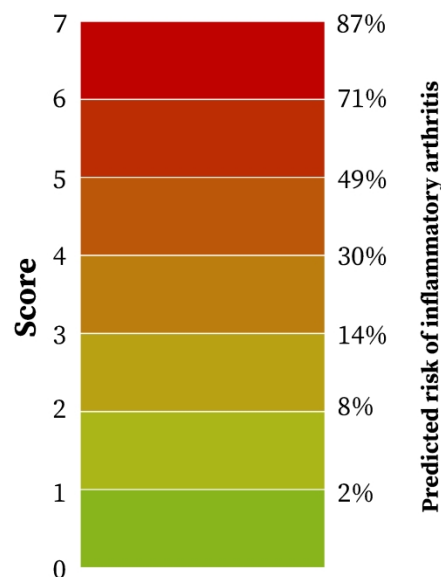

Calculate risk!

This calculator has the option to calculate the risks of current inflammatory arthritis in settings with different pre-test probabilities (i.e. prevalences). The calculator was derived and validated in patients in whom GPs suspected inflammatory arthritis and in whom inflammatory arthritis was confirmed in 41% of cases. Data obtained in (other) GP practices suggested that the pre-test risk in patient with suspected inflammatory arthritis is approximately 20%. Therefore the calculator can also estimate the risk on inflammatory arthritis in this setting.

Figure 3. A stylized representation of the Clinical Arthritis Rule, to be used in patients in whom GPs doubt about the presence of inflammatory arthritis.

Legend:

The web application that provides predictions on the predicted risk of inflammatory arthritis for individual patients as can be accessed at <http://caretool.eu/>

263x386mm (300 x 300 DPI)

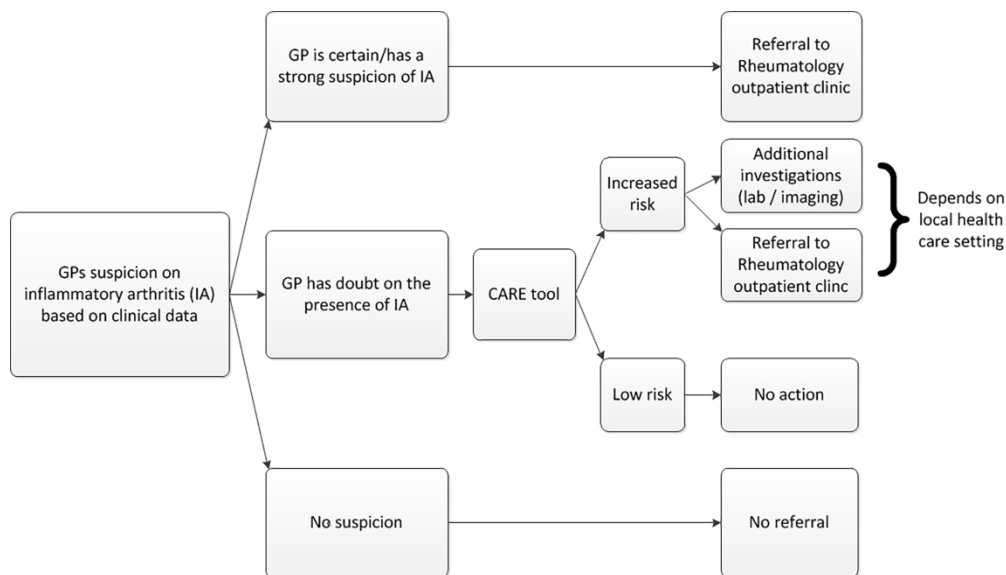

FIGURE 4. Flowchart of decision-making in patients with suspected early IA based on clinical characteristics and the role of the Clinical Arthritis Rule

274x155mm (300 x 300 DPI)

## S1 Appendix. The questionnaire (in Dutch) completed by patients at the Early Arthritis

### Recognition Clinic (EARC).

**EARC vragenlijst**

U komt bij de reumatoloog aan de beurt als u deze vragenlijst heeft ingevuld.

Heeft u een LUMC nummer? Zo ja: wat is uw LUMC nr:

Wat is uw geboortedatum:   -   -

Wat is uw geslacht:  vrouw  man

Wat is de datum van uw eerste klacht?   -   -

Wat is de datum van uw eerste bezoek aan de huisarts in verband met uw gewrichtsklachten?   -   -

Ontstonden uw klachten plotseling of geleidelijk?  plotseling  geleidelijk  
 (kies één van de twee)

Heeft u last van stijfheid als u 's morgens opstaat?  nee  ja; hoeveel minuten?

Kost het u moeite om een vuist te maken?  nee  ja

Wanneer heeft u de meeste last van uw gewrichtsklachten? (kies één van de twee)  vroege ochtend  einde van de dag

Wilt u in de pop (in de rondjes) aankruisen in welke gewrichten u pijn heeft?

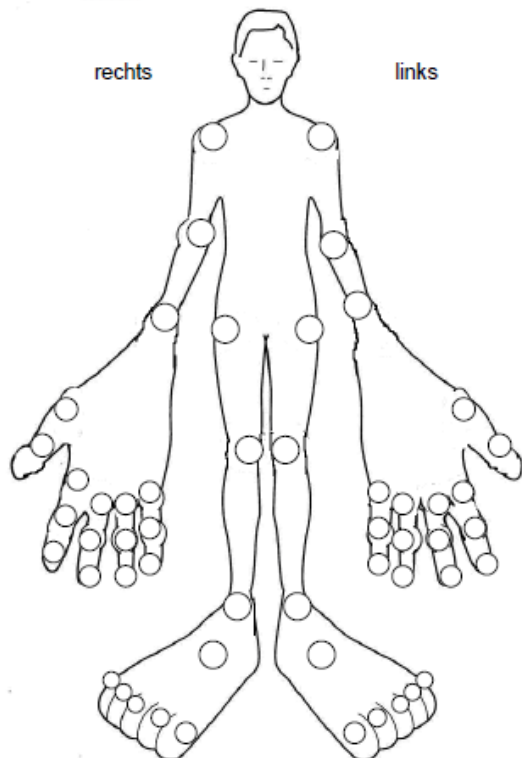

Wilt u in de pop (in de rondjes) aankruisen welke gewrichten u gezwollen vindt?

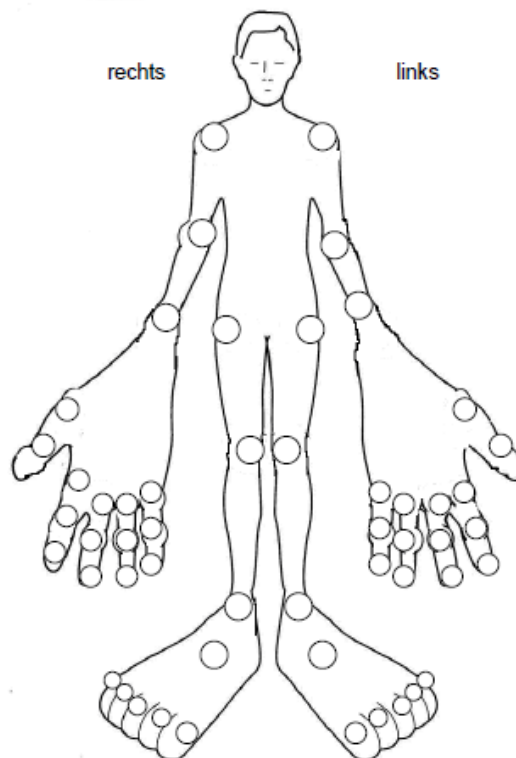

2801023769

**Legend:**

Patients filled this questionnaire at the Early Arthritis *Recognition* Clinic, before they were seen for joint examination by a rheumatologist. This version was used from April 2012 onwards. The question on ‘difficulty with making a fist’ and the mannequin for ‘self-reported joint swelling’ were added to the questionnaire at April 1st 2012 and were not included before this date. All other questions were similar before and after April 2012.

For peer review only

1  
2  
3 **S2 Appendix. Frequencies of missing variables.**  
4  
5  
6

7  
8  
9

|                                      | <b>Derivation<br/>(N=644)</b> | <b>Validation<br/>(N=644)</b> |
|--------------------------------------|-------------------------------|-------------------------------|
| <b>Gender</b>                        | 0 (0)                         | 0 (0)                         |
| <b>Age</b>                           | 0 (0)                         | 0 (0)                         |
| <b>Symptom duration</b>              | 48 (8)                        | 32 (5)                        |
| <b>Acute onset of symptoms</b>       | 12 (2)                        | 17 (3)                        |
| <b>Morning stiffness in minutes</b>  | 95 (15)                       | 79 (12)                       |
| <b>Number of painful joints</b>      | 5 (1)                         | 7 (1)                         |
| <b>Number of swollen joints</b>      | 234 (36)                      | 238 (37)                      |
| <b>Difficulty with making a fist</b> | 249 (39)                      | 254 (39)                      |
| <b>Arthritis present</b>             | 0 (0)                         | 0 (0)                         |

10  
11  
12  
13  
14  
15  
16  
17  
18  
19  
20  
21  
22  
23  
24  
25  
26  
27  
28  
29  
30  
31  
32  
33

34  
35 **Legend:**

36 Variables are indicated as number of patients with missing data (percentage) unless otherwise  
37 indicated. Patient reported swollen-joint count and difficulty with making a fist were added to the  
38 questionnaire after April 1<sup>st</sup> 2012; therefore these missing data was completely at random.  
39  
40  
41  
42  
43  
44  
45  
46  
47  
48  
49  
50  
51  
52  
53  
54  
55  
56  
57  
58  
59  
60

**S3 Appendix. Frequency of synovitis per number of visits per year.**

|                                         | <b>Nr. of visits</b> | <b>Arthritis present</b><br><b>(% of visits per year)</b> |
|-----------------------------------------|----------------------|-----------------------------------------------------------|
| 2010 (starting from 31 August)          | 136                  | 61 (45)                                                   |
| 2011                                    | 264                  | 103 (39)                                                  |
| 2012                                    | 296                  | 132 (45)                                                  |
| 2013                                    | 252                  | 105 (42)                                                  |
| 2014                                    | 203                  | 72 (36)                                                   |
| 2015 (up to and including 24 September) | 137                  | 50 (37)                                                   |
| <b>Total</b>                            | <b>1288</b>          | <b>523 (41)</b>                                           |

**S4 Appendix. Simplified model based on the derivation dataset, with arthritis upon examination as dependent variable using backward stepwise logistic regression.**

| Step 2.                              | Derivation (N=644)        |            |
|--------------------------------------|---------------------------|------------|
|                                      | OR (95%CI)                | B          |
| <b>Male</b>                          | 1.7 (1.1–2.4)             | 0.503      |
| <b>Age, years</b>                    |                           |            |
| 0 – 59.9                             | (ref)                     | (ref)      |
| ≥ 60                                 | 2.1 (1.5–3.2)             | 0.762      |
| <b>Symptom duration, weeks</b>       |                           |            |
| < 6                                  | 3.5 (2.1–5.6)             | 1.246      |
| 6–51.9                               | 2.2 (1.4–3.5)             | 0.783      |
| ≥ 52                                 | (ref)                     | (ref)      |
| <b>Acute onset of complaints</b>     | <i>Excluded at step 1</i> | <i>N/A</i> |
| <b>Morning stiffness &gt;60 min</b>  | 1.7 (1.0–2.7)             | 0.523      |
| <b>Number of painful joints</b>      |                           |            |
| 0                                    | (ref)                     | (ref)      |
| 1–3                                  | 10.6 (1.3–87.8)           | 2.361      |
| ≥ 4                                  | 4.6 (0.56–37.7)           | 1.527      |
| <b>Number of swollen joints</b>      |                           |            |
| 0                                    | (ref)                     | (ref)      |
| ≥ 1                                  | 3.1 (1.7–5.6)             | 1.142      |
| <b>Difficulty with making a fist</b> | 1.5 (1.0–2.1)             | 0.372      |

**Legend:**

Abbreviations: B = beta; CI = confidence interval; OR = odds ratio.



**S5 Appendix. Simplified model based on the derivation dataset, with arthritis upon examination as dependent variable.**

| <b>Derivation (N=644)</b>            |                   |          |               |
|--------------------------------------|-------------------|----------|---------------|
|                                      | <b>OR (95%CI)</b> | <b>B</b> | <b>points</b> |
| <b>Male</b>                          | 1.7 (1.1–2.5)     | 0.517    | 0.5           |
| <b>Age, years</b>                    |                   |          |               |
| 0 – 59.9                             | (ref)             | (ref)    | 0             |
| ≥ 60                                 | 2.1 (1.4–3.1)     | 0.750    | 0.5           |
| <b>Symptom duration, weeks</b>       |                   |          |               |
| < 6                                  | 3.6 (2.2–6.0)     | 1.279    | 1.5           |
| 6–51.9                               | 2.2 (1.4–3.6)     | 0.797    | 1             |
| ≥ 52                                 | (ref)             | (ref)    | 0             |
| <b>Acute onset of complaints</b>     | 0.99 (0.66–1.5)   | -0.015   | 0             |
| <b>Morning stiffness &gt;60 min</b>  | 1.6 (0.91–2.9)    | 0.485    | 0.5           |
| <b>Number of painful joints</b>      |                   |          |               |
| 0                                    | (ref)             | (ref)    | 0             |
| 1–3                                  | 10.0 (1.2–83.4)   | 2.300    | 2.5           |
| ≥ 4                                  | 4.5 (0.54–37.1)   | 1.497    | 1.5           |
| <b>Number of swollen joints</b>      |                   |          |               |
| 0                                    | (ref)             | (ref)    | 0             |
| ≥ 1                                  | 3.5 (1.9–6.6)     | 1.253    | 1.5           |
| <b>Difficulty with making a fist</b> | 1.6 (0.99–2.6)    | 0.467    | 0.5           |

**Legend:**

Abbreviations: B = beta; CI = confidence interval; OR = odds ratio.

**S6 Appendix. Calibration plot showing the observed probabilities on current inflammatory arthritis in the derivation (A) and validation dataset (B) versus the predicted probabilities according to the model.**

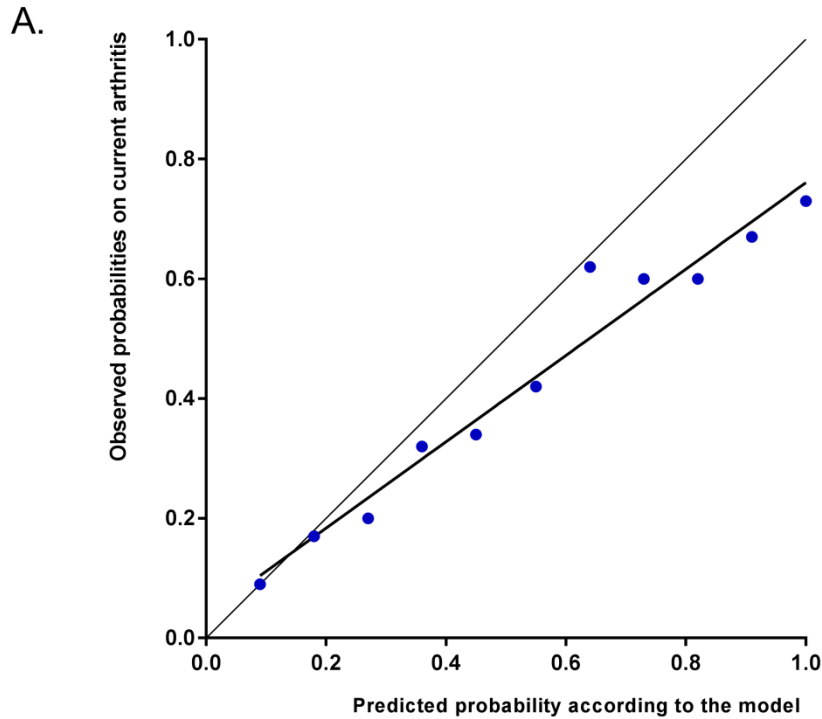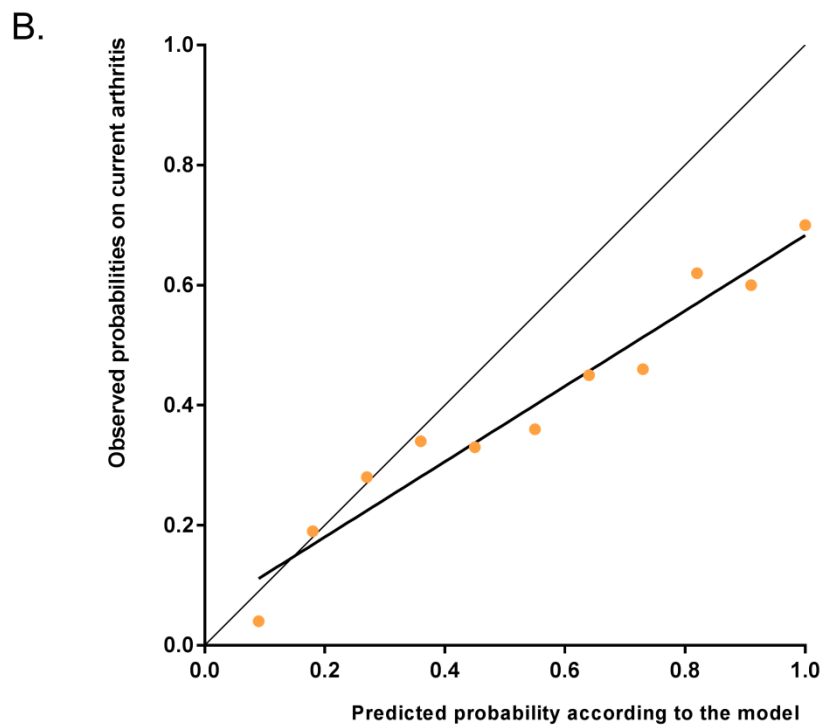

**Legend:**

1  
2  
3 Predicted probabilities using the final fitted multivariable model in the validation dataset  
4  
5 were partitioned in 10 equally sized groups. In each group, the average predicted probability  
6  
7 on inflammatory arthritis was compared with observed prevalence of inflammatory arthritis  
8  
9 in the validation dataset. Regression lines were fitted to the calibration plot and revealed a  
10  
11 coefficient of 0.73 and an intercept of 0.03 in the derivation dataset and a coefficient of 0.62  
12  
13 and an intercept of 0.061 in the validation dataset.  
14  
15  
16  
17  
18  
19  
20  
21  
22  
23  
24  
25  
26  
27  
28  
29  
30  
31  
32  
33  
34  
35  
36  
37  
38  
39  
40  
41  
42  
43  
44  
45  
46  
47  
48  
49  
50  
51  
52  
53  
54  
55  
56  
57  
58  
59  
60

For peer review only

**S7 Appendix. Test characteristics of the simplified model in both the derivation and validation dataset with presence of synovitis upon joint examination as outcome.**

| Cut-off<br>( $\geq$ ) | Derivation (N=644) |                    | Validation (N=644) |                    |
|-----------------------|--------------------|--------------------|--------------------|--------------------|
|                       | Sensitivity<br>(%) | Specificity<br>(%) | Sensitivity<br>(%) | Specificity<br>(%) |
| 1                     | 100                | 0.8                |                    |                    |
| 2                     | 99.9               | 3.3                | 99.5               | 1.5                |
| 3                     | 98.7               | 7.7                | 99.3               | 7.8                |
| 4                     | 93.6               | 35.6               | 90.8               | 35.9               |
| 4.5                   | 85.8               | 52.8               | 78.1               | 50.0               |
| 5                     | 67.6               | 68.0               | 63.9               | 67.0               |
| 5.5                   | 45.0               | 82.7               | 43.5               | 83.4               |
| 6                     | 23.1               | 92.1               | 21.6               | 92.8               |
| 7                     | 2.5                | 99.4               | 2.1                | 99.7               |

**Legend:**

Sensitivity was obtained by calculating the probability that the Clinical Arthritis Rule indicated 'disease' positive among those actually identified with inflammatory by the rheumatologist. Specificity was obtained by calculating the fraction of those without inflammatory arthritis that had a negative test result on the Clinical Arthritis Rule.

1  
2  
3 **S8 Appendix. Receiver operator characteristics curves for the logistic regression models**  
4 **with presence of synovitis upon joint examination as outcome, showing sensitivity and**  
5 **specificity of both regression score and simplified tool score in the derivation and**  
6 **validation dataset.**  
7  
8  
9  
10  
11  
12

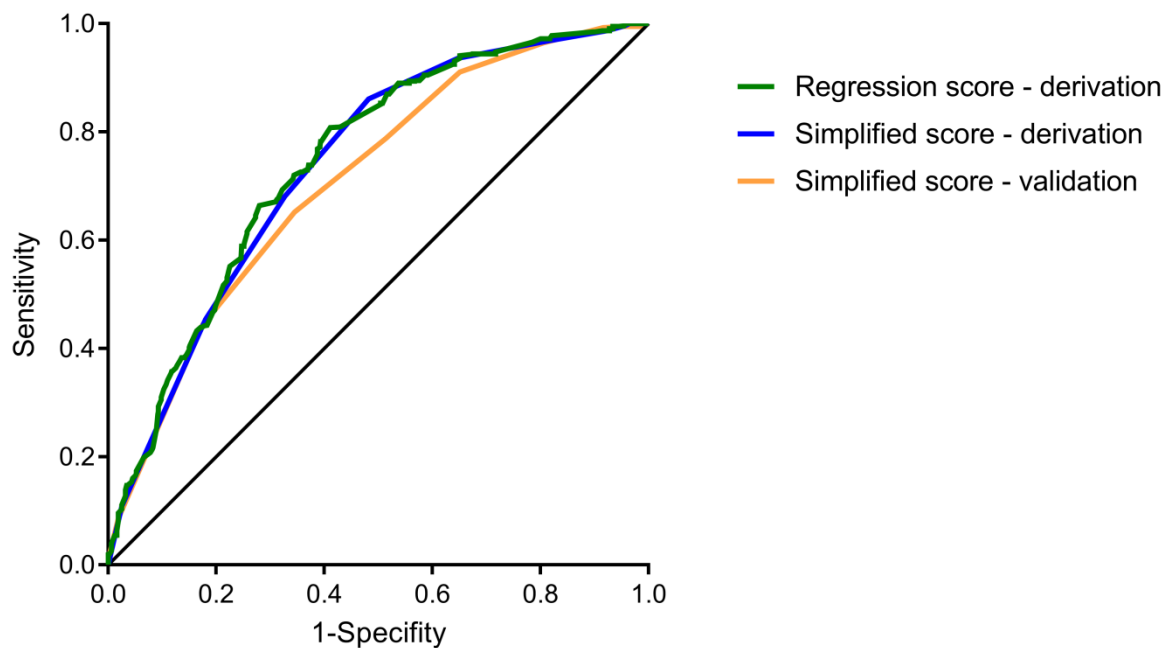

37 **Legend:**

38  
39  
40 The Area Under Receiver Operator Curve (AUC) for the different models was: for the  
41 regression model in the derivation dataset 0.75 (95%CI 0.70–0.79), for the simplified score in  
42 the derivation dataset 0.74 (95%CI 0.70–0.78), and for the simplified score in the validation  
43 dataset 0.71 (95%CI 0.67–0.75).  
44  
45  
46  
47  
48  
49  
50  
51  
52  
53  
54  
55  
56  
57  
58  
59  
60

STROBE Statement—Checklist of items that should be included in reports of *cross-sectional studies*

|                              | Item No | Recommendation                                                                                                                                                                                                                                                                                                                                                                                                                                                                                                                   |
|------------------------------|---------|----------------------------------------------------------------------------------------------------------------------------------------------------------------------------------------------------------------------------------------------------------------------------------------------------------------------------------------------------------------------------------------------------------------------------------------------------------------------------------------------------------------------------------|
| <b>Title and abstract</b>    | 1       | (a) Indicate the study's design with a commonly used term in the title or the abstract<br><b>[The design of the study is described in the abstract, see Page 2; Methods and Findings]</b><br><br>(b) Provide in the abstract an informative and balanced summary of what was done and what was found<br><b>[Page 2; Methods and Findings]</b>                                                                                                                                                                                    |
| <b>Introduction</b>          |         |                                                                                                                                                                                                                                                                                                                                                                                                                                                                                                                                  |
| Background/rationale         | 2       | Explain the scientific background and rationale for the investigation being reported<br><b>[Page 4-5; Introduction describes that scientific background]</b>                                                                                                                                                                                                                                                                                                                                                                     |
| Objectives                   | 3       | State specific objectives, including any prespecified hypotheses<br><b>[Page 5; Introduction. "We have developed and validated a rule composed of clinical characteristics (...) which may assist in the decision-making process in patients with musculoskeletal symptoms with suspected IA at other places, in order to promote early identification of IA."]</b>                                                                                                                                                              |
| <b>Methods</b>               |         |                                                                                                                                                                                                                                                                                                                                                                                                                                                                                                                                  |
| Study design                 | 4       | Present key elements of study design early in the paper<br><b>[Page 5-10; Methods.]</b>                                                                                                                                                                                                                                                                                                                                                                                                                                          |
| Setting                      | 5       | Describe the setting, locations, and relevant dates, including periods of recruitment, exposure, follow-up, and data collection<br><b>[Page 5-7; Methods. Setting: "the Early Arthritis Recognition Clinic" at the "Leiden University Medical Center". Relevant dates: "All patients that visited the EARC between 2010 and September 2015 were studied." Data collection: "At the EARC, patients completed a short questionnaire about their joint symptoms, after which they were seen by an experienced rheumatologist."]</b> |
| Participants                 | 6       | (a) Give the eligibility criteria, and the sources and methods of selection of participants<br><b>[Page 5,6; Methods, section Study population]</b>                                                                                                                                                                                                                                                                                                                                                                              |
| Variables                    | 7       | Clearly define all outcomes, exposures, predictors, potential confounders, and effect modifiers. Give diagnostic criteria, if applicable<br><b>[Page 7-9; Methods, sections Data collection and Derivation and validation of the model]</b>                                                                                                                                                                                                                                                                                      |
| Data sources/<br>measurement | 8*      | For each variable of interest, give sources of data and details of methods of assessment (measurement). Describe comparability of assessment methods if there is more than one group<br><b>[Page 7-9; Methods, sections Data collection and Derivation and validation of the model]</b>                                                                                                                                                                                                                                          |
| Bias                         | 9       | Describe any efforts to address potential sources of bias<br><b>[Page 7; Methods, section Derivation and validation of the model.]</b>                                                                                                                                                                                                                                                                                                                                                                                           |
| Study size                   | 10      | Explain how the study size was arrived at<br><b>[Page 10; Results: "1,288 patients in whom GPs were unsure about the presence of IA visited the EARC between 2010 and 2015"]</b>                                                                                                                                                                                                                                                                                                                                                 |
| Quantitative variables       | 11      | Explain how quantitative variables were handled in the analyses. If applicable, describe which groupings were chosen and why<br><b>[Page 7-9; Methods, section Derivation and validation of the model]</b>                                                                                                                                                                                                                                                                                                                       |
| Statistical methods          | 12      | (a) Describe all statistical methods, including those used to control for confounding                                                                                                                                                                                                                                                                                                                                                                                                                                            |

|                   |     |                                                                                                                                                                                                                                                                                                                                                  |
|-------------------|-----|--------------------------------------------------------------------------------------------------------------------------------------------------------------------------------------------------------------------------------------------------------------------------------------------------------------------------------------------------|
|                   |     | <b>[Page 7–9; Methods, section Derivation and validation of the model]</b>                                                                                                                                                                                                                                                                       |
|                   |     | (b) Describe any methods used to examine subgroups and interactions                                                                                                                                                                                                                                                                              |
|                   |     | <b>[N/A]</b>                                                                                                                                                                                                                                                                                                                                     |
|                   |     | (c) Explain how missing data were addressed                                                                                                                                                                                                                                                                                                      |
|                   |     | <b>[Page 7; Methods: “To prevent exclusion of patients with one or more missing variables, we imputed missing values using chained equations.”]</b>                                                                                                                                                                                              |
|                   |     | (d) If applicable, describe analytical methods taking account of sampling strategy                                                                                                                                                                                                                                                               |
|                   |     | <b>[N/A]</b>                                                                                                                                                                                                                                                                                                                                     |
|                   |     | (e) Describe any sensitivity analyses                                                                                                                                                                                                                                                                                                            |
|                   |     | <b>[N/A]</b>                                                                                                                                                                                                                                                                                                                                     |
| <b>Results</b>    |     |                                                                                                                                                                                                                                                                                                                                                  |
| Participants      | 13* | (a) Report numbers of individuals at each stage of study—eg numbers potentially eligible, examined for eligibility, confirmed eligible, included in the study, completing follow-up, and analysed<br><b>[Page 10; Results: “1,288 patients in whom GPs were unsure about the presence of IA visited the EARC between 2010 and 2015”]</b>         |
|                   |     | (b) Give reasons for non-participation at each stage                                                                                                                                                                                                                                                                                             |
|                   |     | <b>[N/A]</b>                                                                                                                                                                                                                                                                                                                                     |
|                   |     | (c) Consider use of a flow diagram                                                                                                                                                                                                                                                                                                               |
|                   |     | <b>[N/A]</b>                                                                                                                                                                                                                                                                                                                                     |
| Descriptive data  | 14* | (a) Give characteristics of study participants (eg demographic, clinical, social) and information on exposures and potential confounders<br><b>[Page 10; Table 1]</b>                                                                                                                                                                            |
|                   |     | (b) Indicate number of participants with missing data for each variable of interest<br><b>[S2 Appendix]</b>                                                                                                                                                                                                                                      |
| Outcome data      | 15* | Report numbers of outcome events or summary measures<br><b>[Page 11 and S3 Appendix; “41% had synovitis at joint examination”]</b>                                                                                                                                                                                                               |
| Main results      | 16  | (a) Give unadjusted estimates and, if applicable, confounder-adjusted estimates and their precision (eg, 95% confidence interval). Make clear which confounders were adjusted for and why they were included<br><b>[Page 10–11; Table 2; Table 3]</b>                                                                                            |
|                   |     | (b) Report category boundaries when continuous variables were categorized<br><b>[Page 7–8; 10–11; Table 2; Table 3]</b>                                                                                                                                                                                                                          |
|                   |     | (c) If relevant, consider translating estimates of relative risk into absolute risk for a meaningful time period                                                                                                                                                                                                                                 |
|                   |     | <b>[N/A]</b>                                                                                                                                                                                                                                                                                                                                     |
| Other analyses    | 17  | Report other analyses done—eg analyses of subgroups and interactions, and sensitivity analyses<br><b>[N/A]</b>                                                                                                                                                                                                                                   |
| <b>Discussion</b> |     |                                                                                                                                                                                                                                                                                                                                                  |
| Key results       | 18  | Summarise key results with reference to study objectives<br><b>[Page 12–13; Discussion]</b>                                                                                                                                                                                                                                                      |
| Limitations       | 19  | Discuss limitations of the study, taking into account sources of potential bias or imprecision. Discuss both direction and magnitude of any potential bias<br><b>[Page 14–15; “A disadvantage of our setting is that the data were not collected in primary care itself, but in a setting intermediary between primary and secondary care.”]</b> |
| Interpretation    | 20  | Give a cautious overall interpretation of results considering objectives, limitations,                                                                                                                                                                                                                                                           |

multiplicity of analyses, results from similar studies, and other relevant evidence  
**[Page 15–16; “In conclusion, this study developed a clinical rule that supports the identification of patients suspected of having IA by physicians that feel insufficiently experienced in assessment of synovitis by joint examination.”]**

---

|                  |    |                                                                                                                                                                                                                                                                                                                                                       |
|------------------|----|-------------------------------------------------------------------------------------------------------------------------------------------------------------------------------------------------------------------------------------------------------------------------------------------------------------------------------------------------------|
| Generalizability | 21 | Discuss the generalizability (external validity) of the study results<br><b>[Page 15–16; “(...)We expect that our rule (Clinical Arthritis Rule - CARE) might support GPs and other health care professionals in the decision-making process in patients with musculoskeletal symptoms in whom they suspect IA, regardless of the region. (...)”]</b> |
|------------------|----|-------------------------------------------------------------------------------------------------------------------------------------------------------------------------------------------------------------------------------------------------------------------------------------------------------------------------------------------------------|

---

#### **Other information**

|         |    |                                                                                                                                                                                                                        |
|---------|----|------------------------------------------------------------------------------------------------------------------------------------------------------------------------------------------------------------------------|
| Funding | 22 | Give the source of funding and the role of the funders for the present study and, if applicable, for the original study on which the present article is based<br><b>[Entered through the online submission system]</b> |
|---------|----|------------------------------------------------------------------------------------------------------------------------------------------------------------------------------------------------------------------------|

---

\*Give information separately for exposed and unexposed groups.

**Note:** An Explanation and Elaboration article discusses each checklist item and gives methodological background and published examples of transparent reporting. The STROBE checklist is best used in conjunction with this article (freely available on the Web sites of PLoS Medicine at <http://www.plosmedicine.org/>, Annals of Internal Medicine at <http://www.annals.org/>, and Epidemiology at <http://www.epidem.com/>). Information on the STROBE Initiative is available at [www.strobe-statement.org](http://www.strobe-statement.org).
